# Supplementary material for: Catechol-O-methyltransferase Inhibitors from Calendula officinalis Leaf
Source: MDPI journal article supplement (doi:10.3390/molecules28031333), 2023-01-30
Supplement: s1 [file s1]

**Supplementary Materials**

**Catechol-*O*-methyltransferase Inhibitors from  
*Calendula officinalis* Leaf**

**Wataru Kadowaki <sup>1,†</sup>, Ryo Miyata <sup>1,†</sup>, Misa Fujinami <sup>2</sup>, Yoshizumi Sato <sup>2</sup> and  
Shigenori Kumazawa <sup>1,\*</sup>**

<sup>1</sup>Graduate School of Integrated Pharmaceutical and Nutritional Sciences, University of  
Shizuoka, Shizuoka, Japan

<sup>2</sup>Kisho Corporation, Tokyo, Japan

\*Correspondence: kumazawa@u-shizuoka-ken.ac.jp

<sup>†</sup>These authors contributed equally to this work.

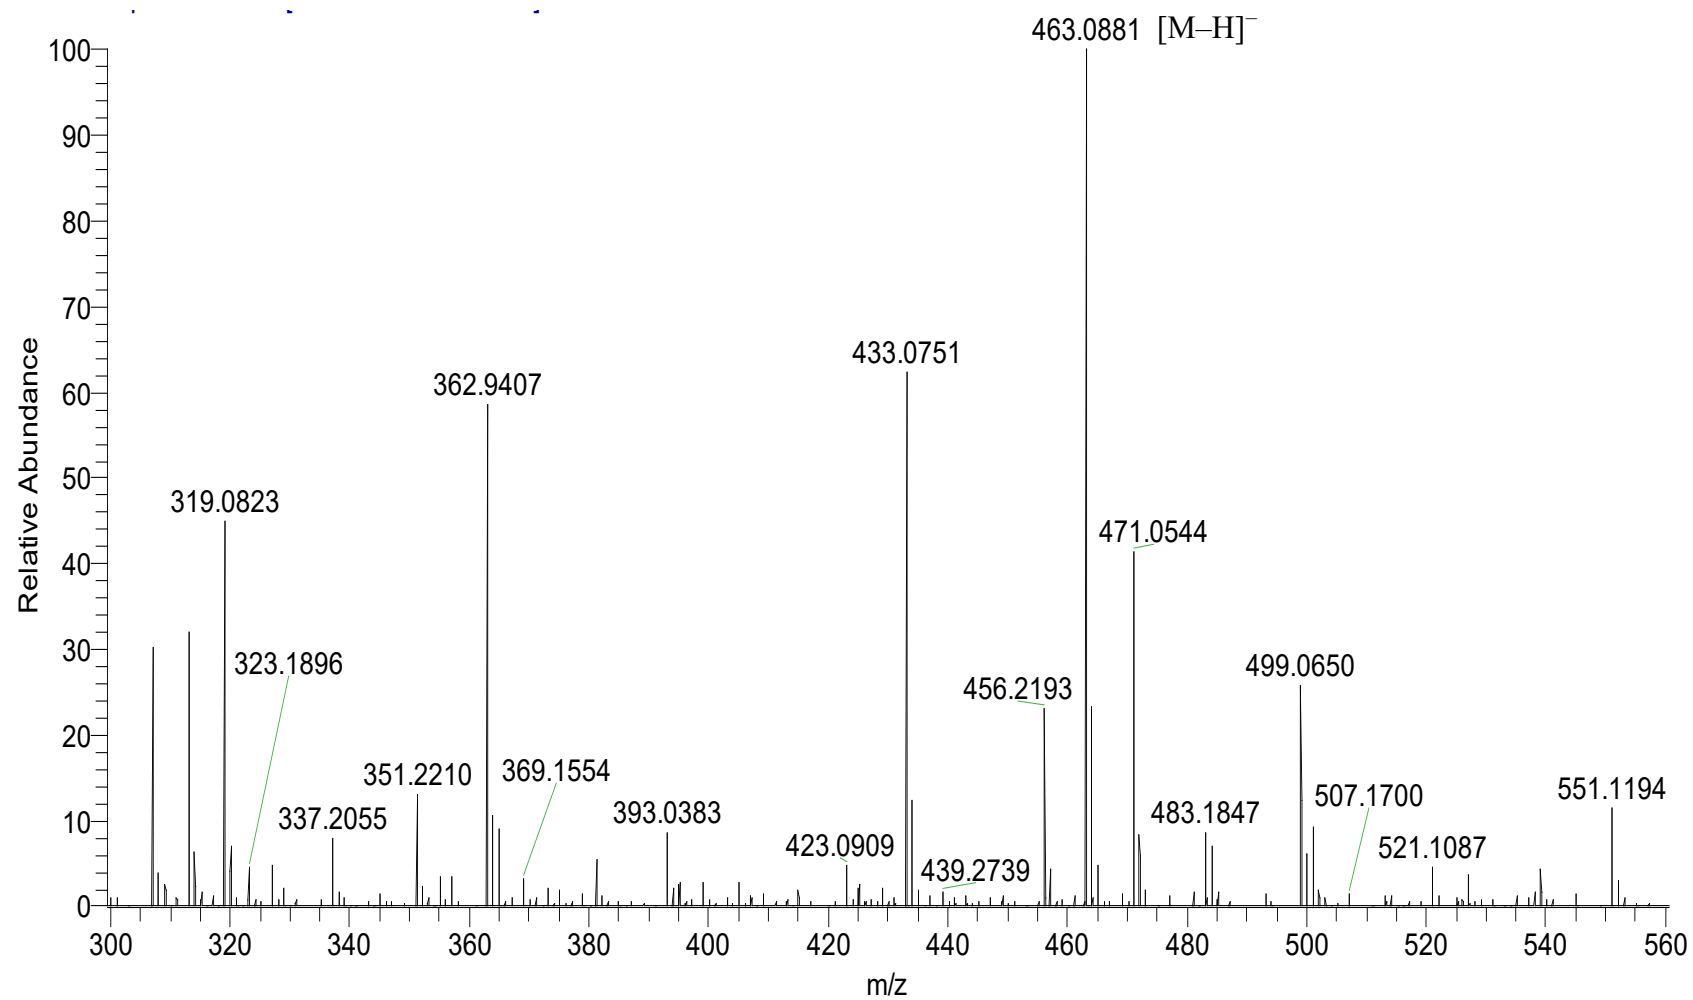

**Figure S1.** HRESIMS spectrum of **1** (negative mode).

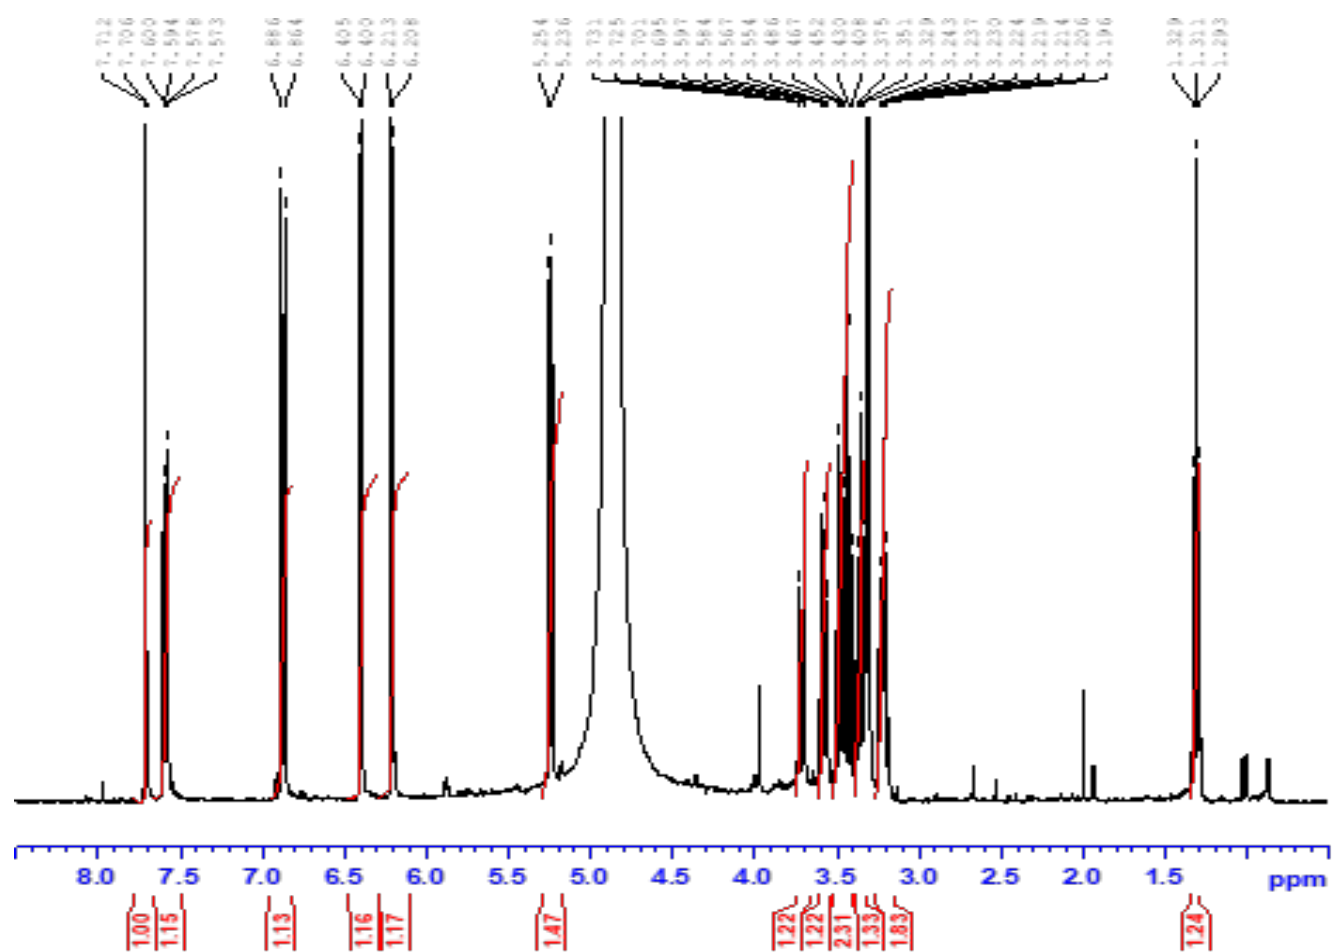

**Figure S2.**  $^1\text{H}$  NMR spectrum of **1** in  $\text{CD}_3\text{OD}$  (400 MHz).

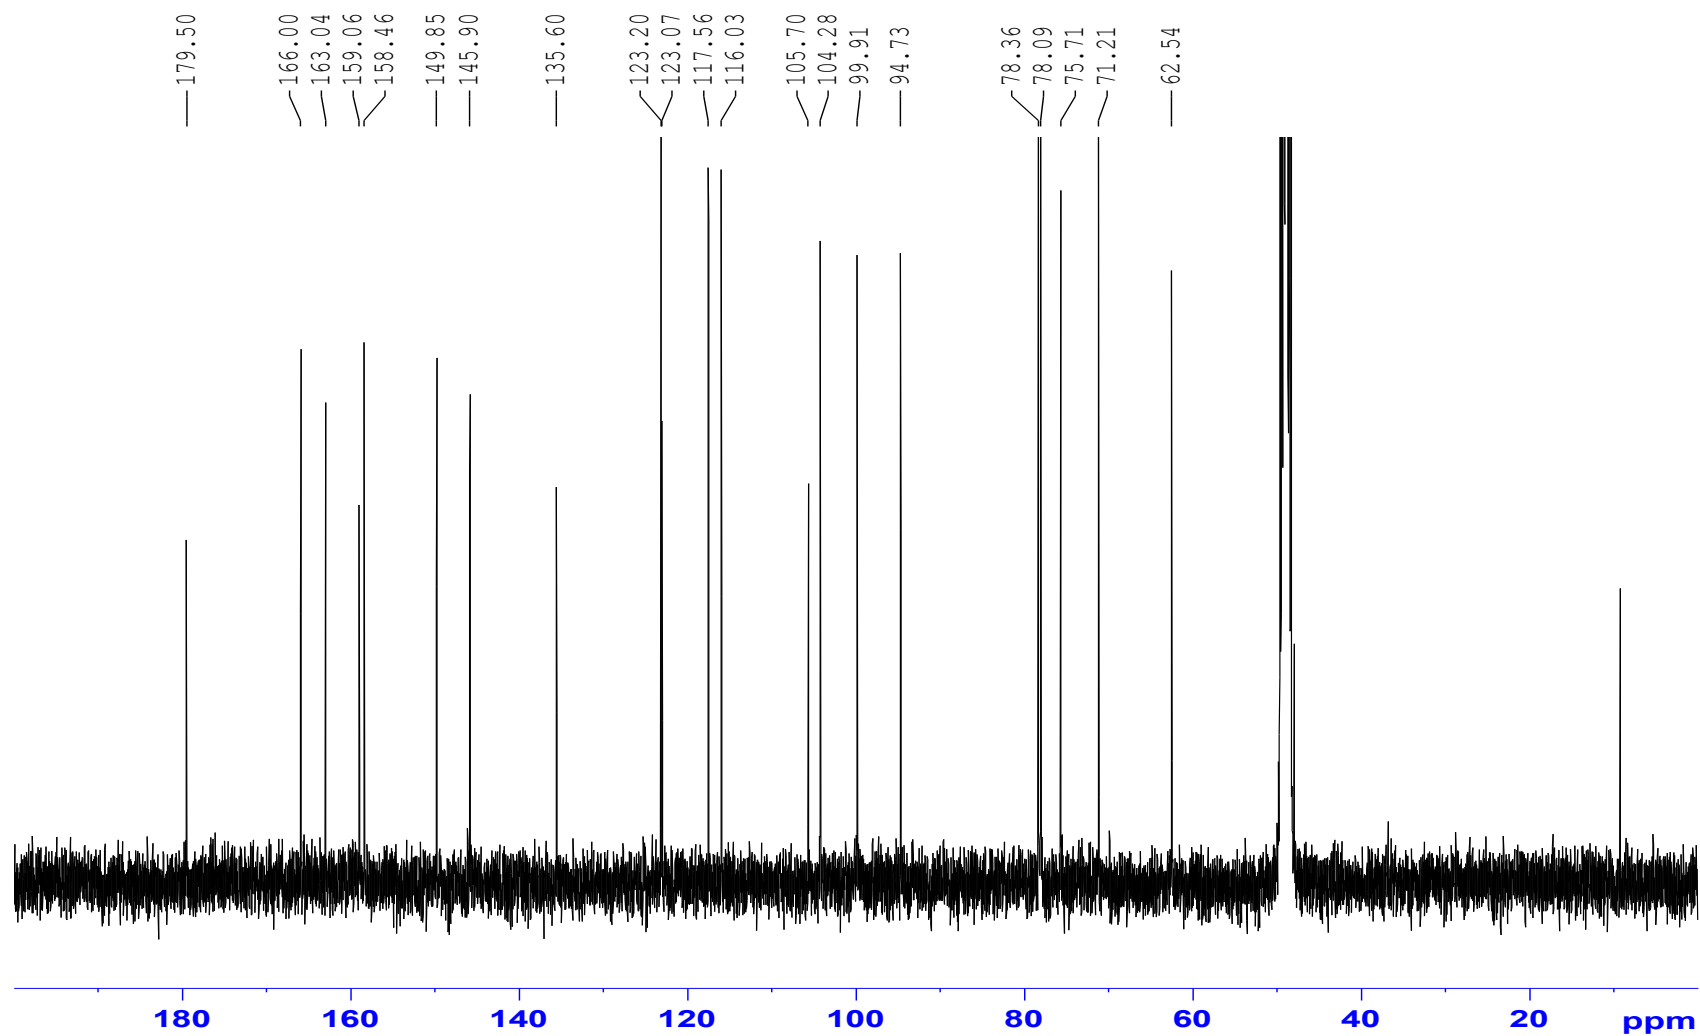

**Figure S3.** <sup>13</sup>C NMR spectrum of **1** in CD<sub>3</sub>OD (100 MHz).

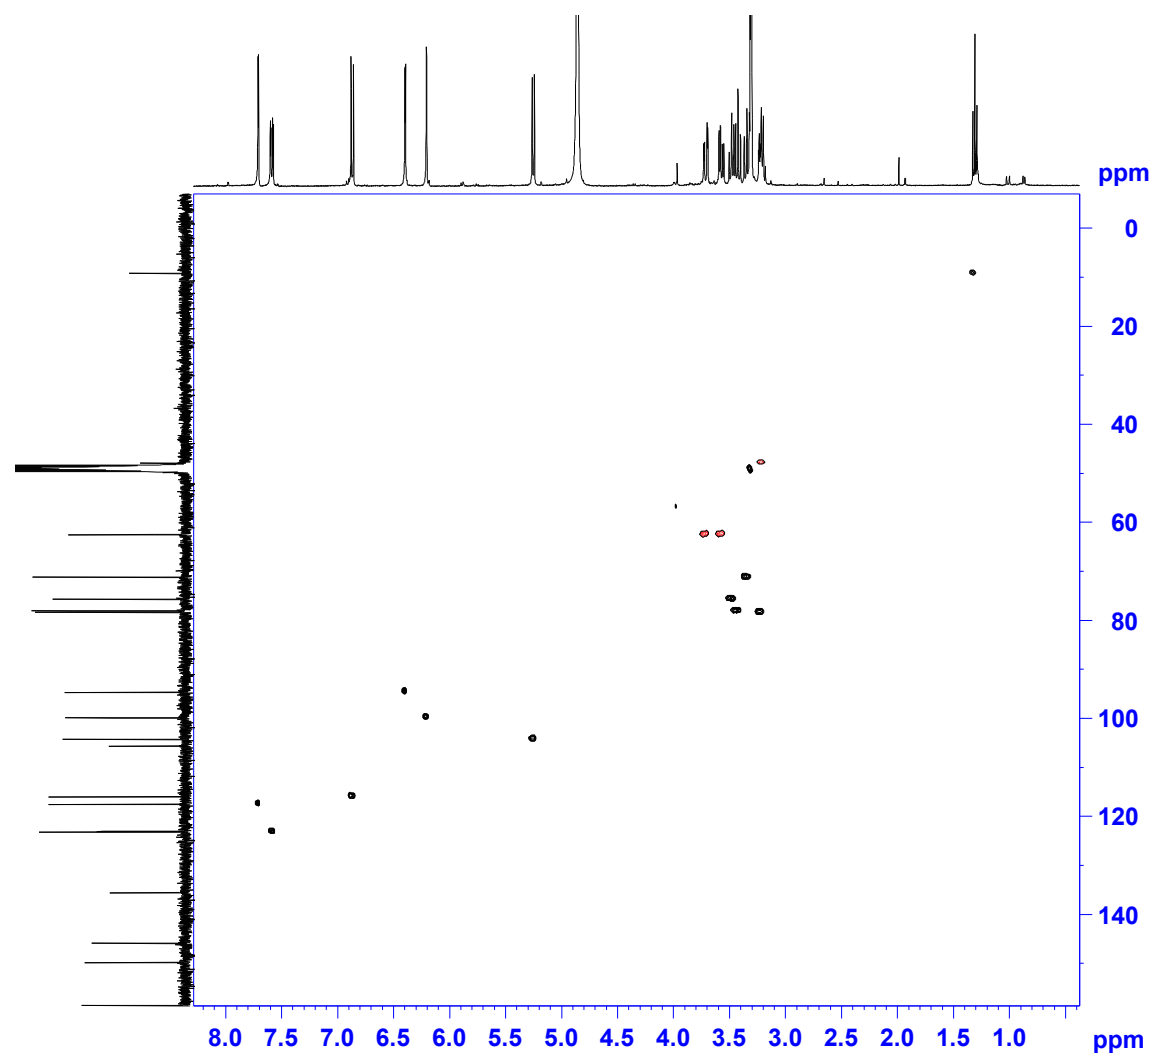

**Figure S4.** HSQC spectrum of **1** in  $\text{CD}_3\text{OD}$ .

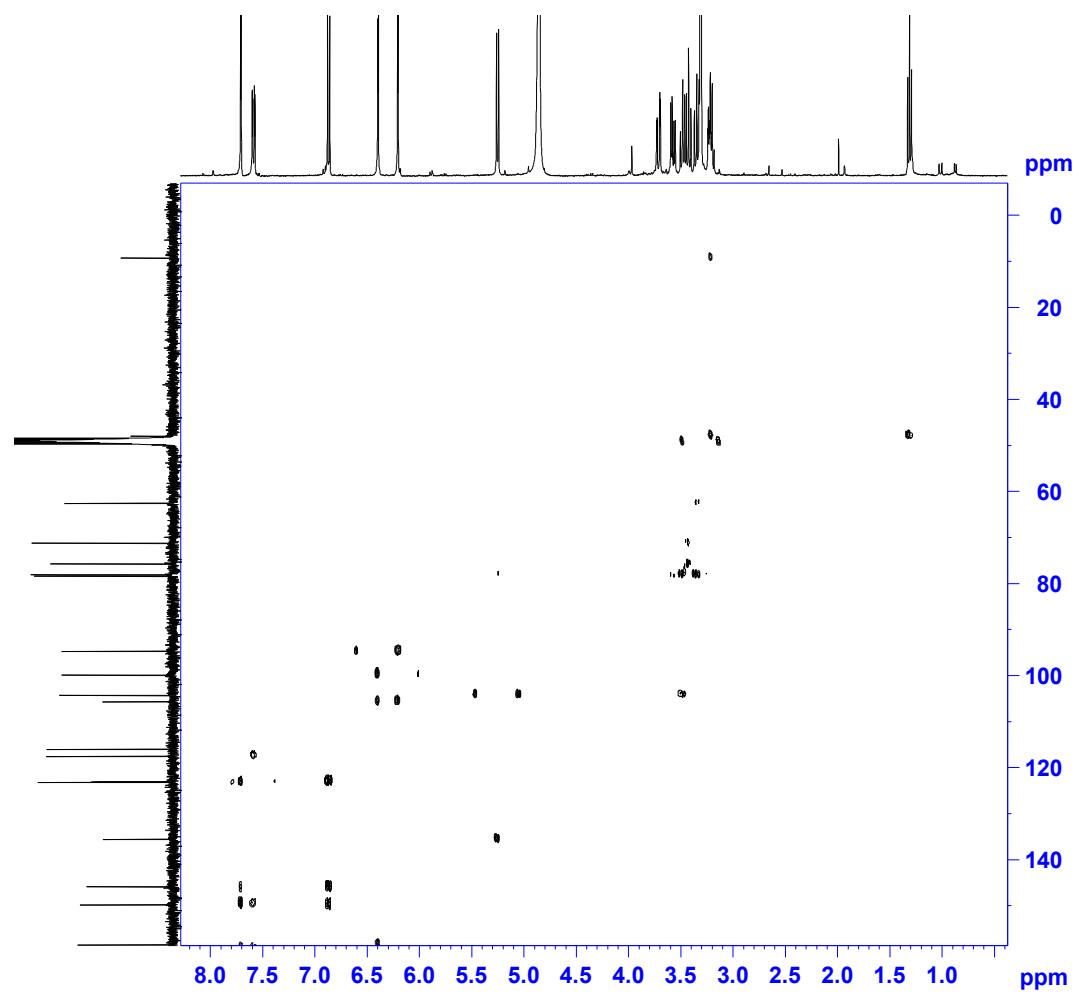

**Figure S5.** HMBC spectrum of **1** in CD<sub>3</sub>OD.

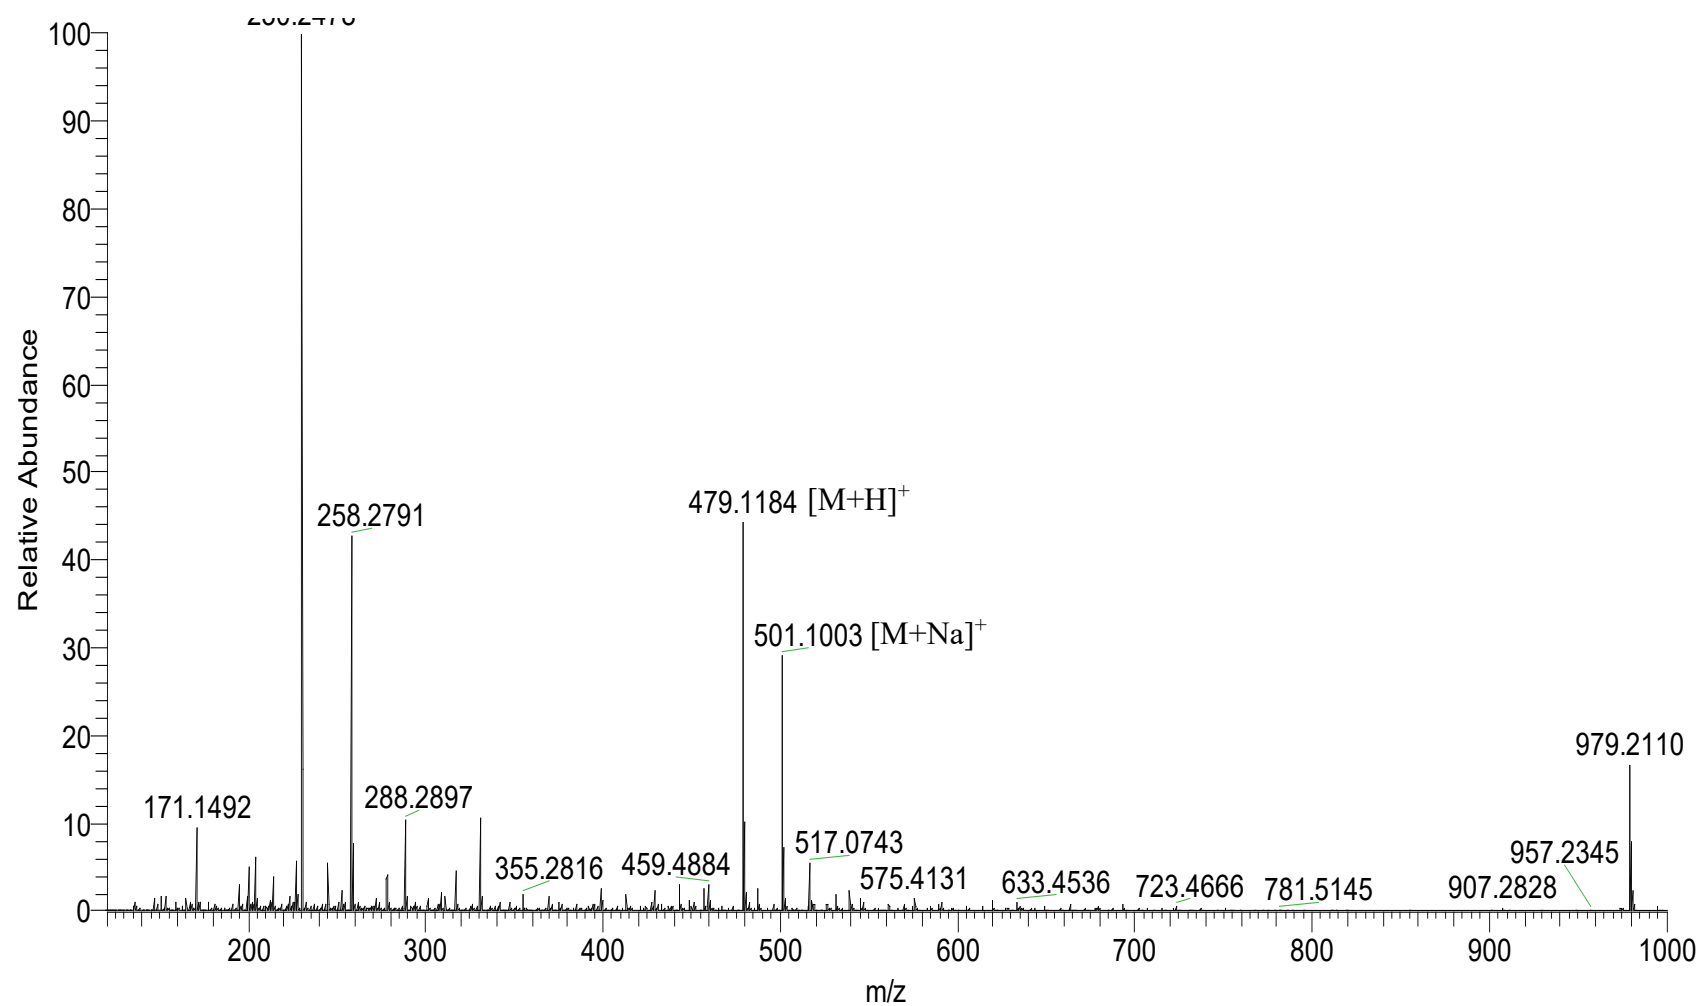

**Figure S6.** HRESIMS spectrum of **2** (positive mode).

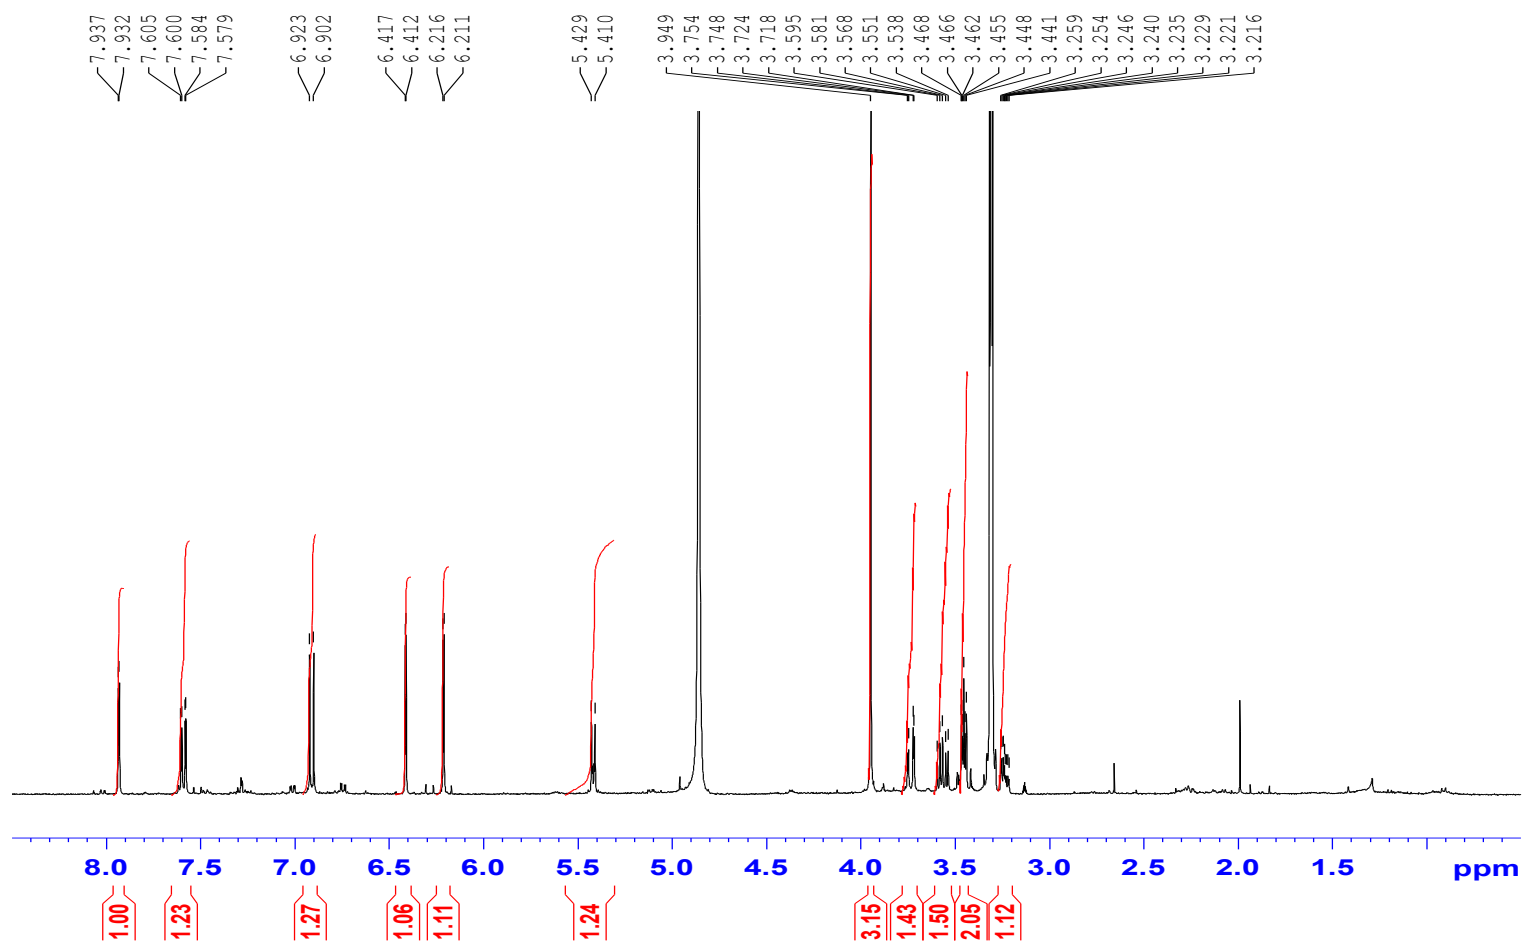

**Figure S7.** <sup>1</sup>H NMR spectrum of **2** in CD<sub>3</sub>OD (400 MHz).



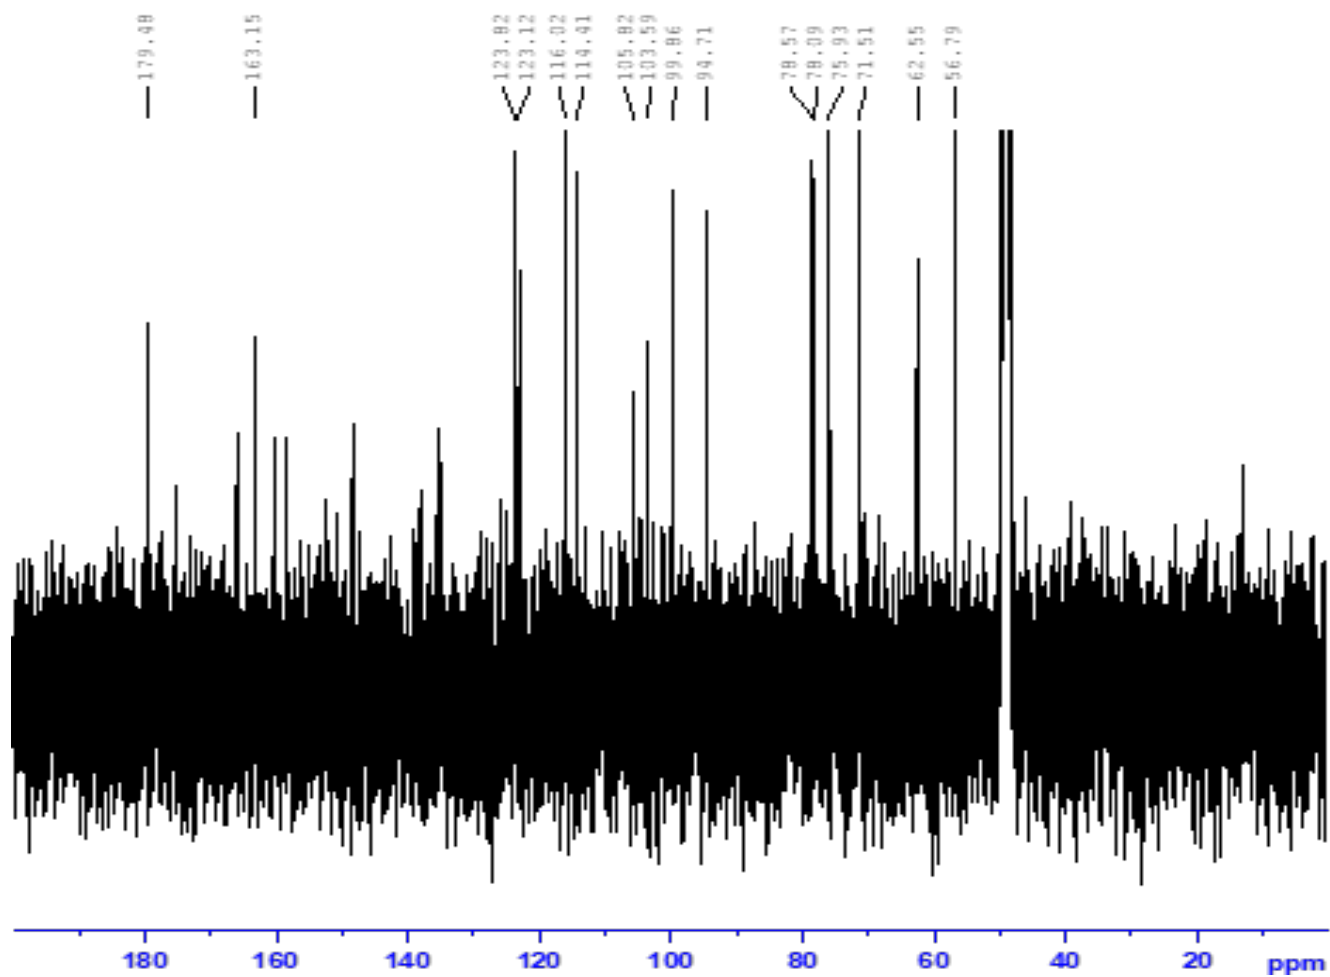

**Figure S8.**  $^{13}\text{C}$  NMR spectrum of **2** in  $\text{CD}_3\text{OD}$  (100 MHz).

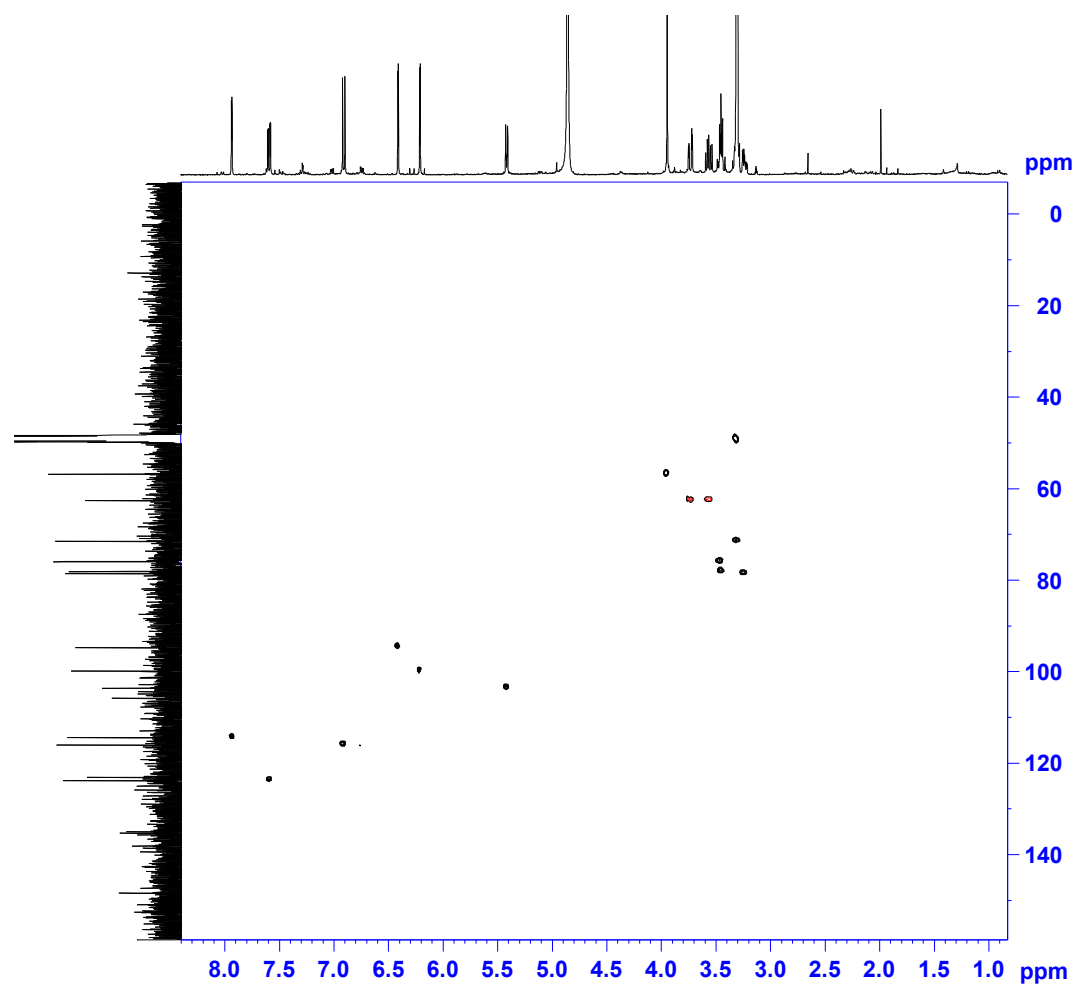

**Figure S9.** HSQC spectrum of **2** in  $\text{CD}_3\text{OD}$ .

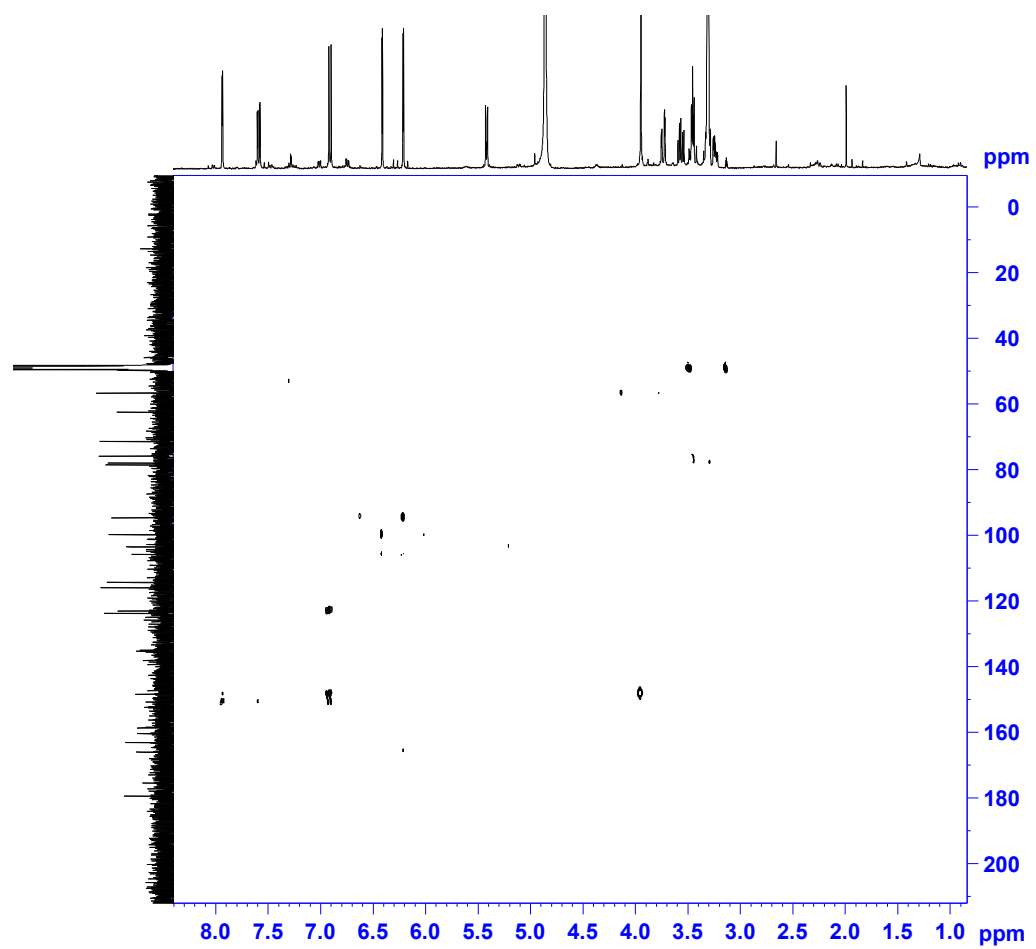

**Figure S10.** HMBC spectrum of **2** in  $\text{CD}_3\text{OD}$ .

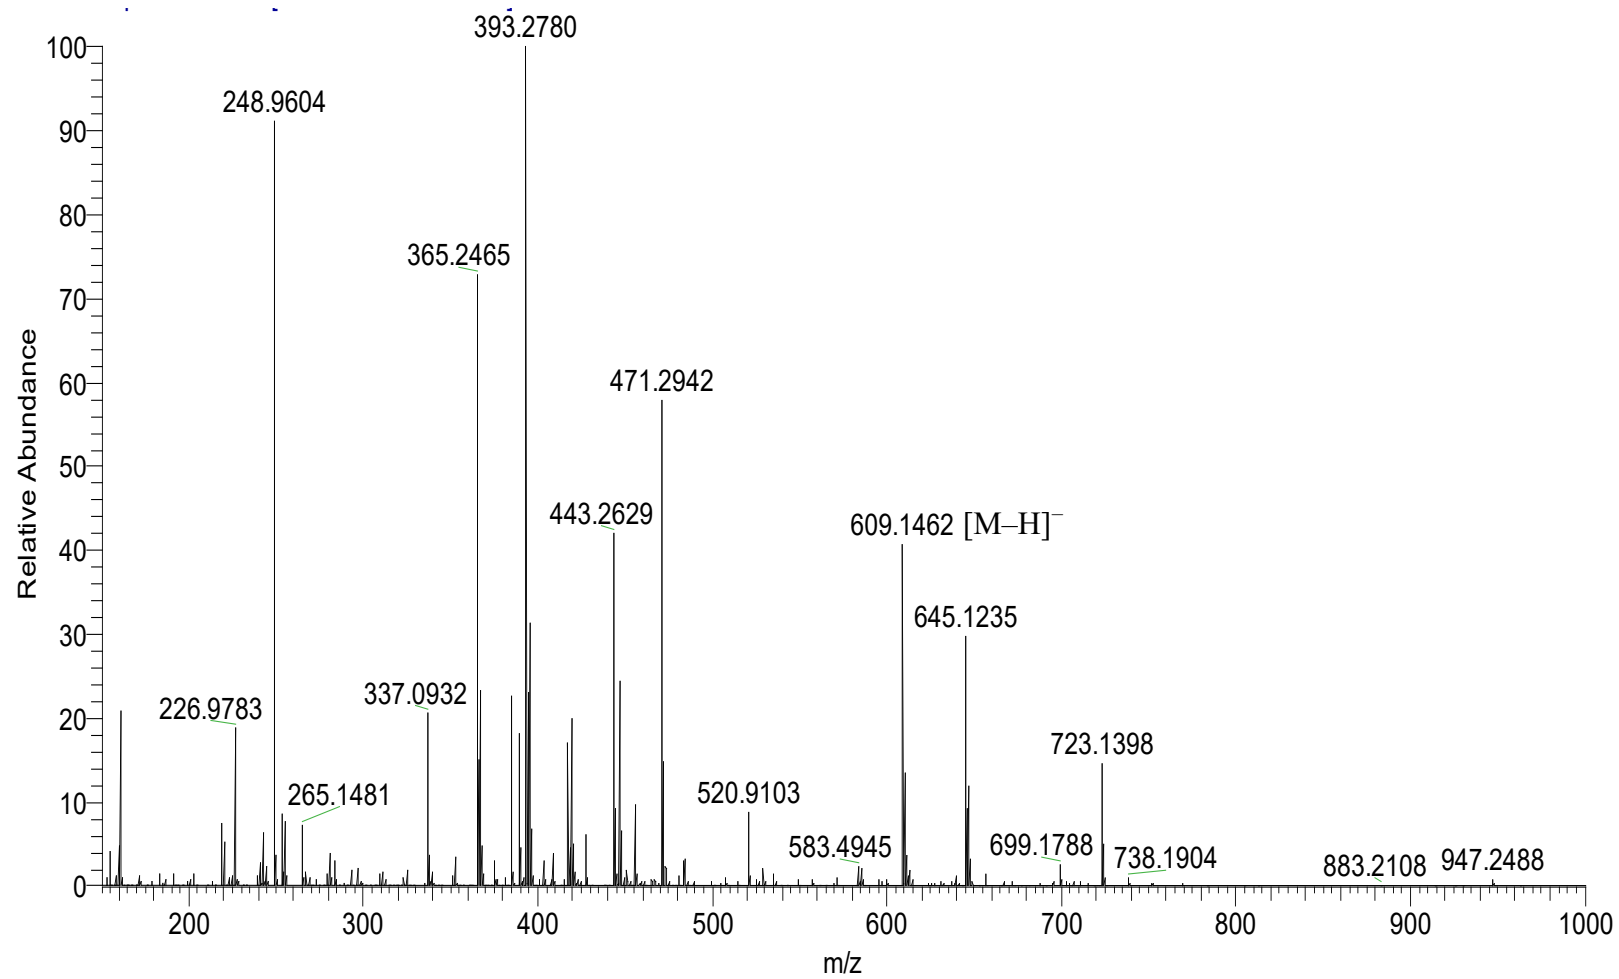

**Figure S11.** HRESIMS spectrum of **3** (negative mode).

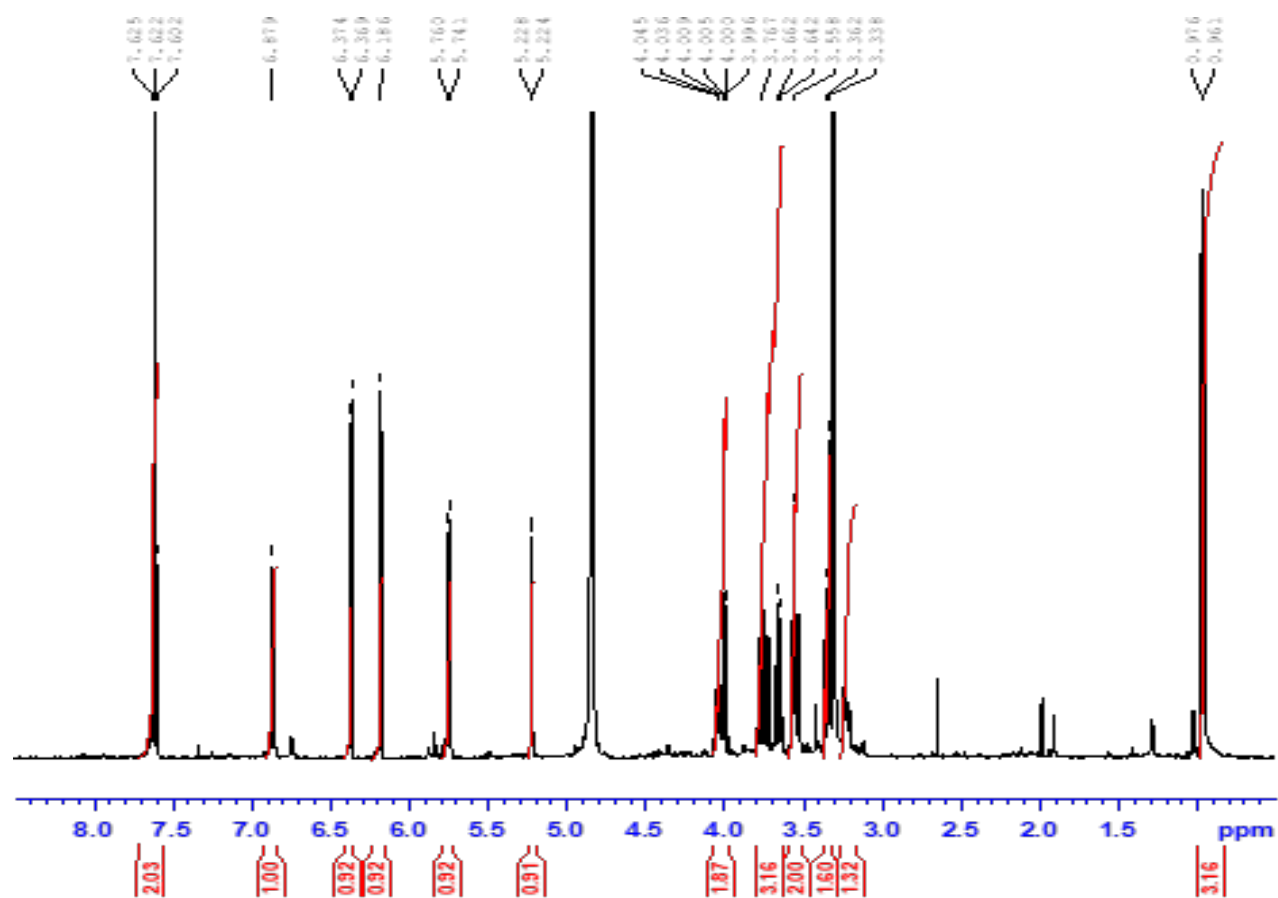

**Figure S12.**  $^1\text{H}$  NMR spectrum of **3** in  $\text{CD}_3\text{OD}$  (400 MHz).

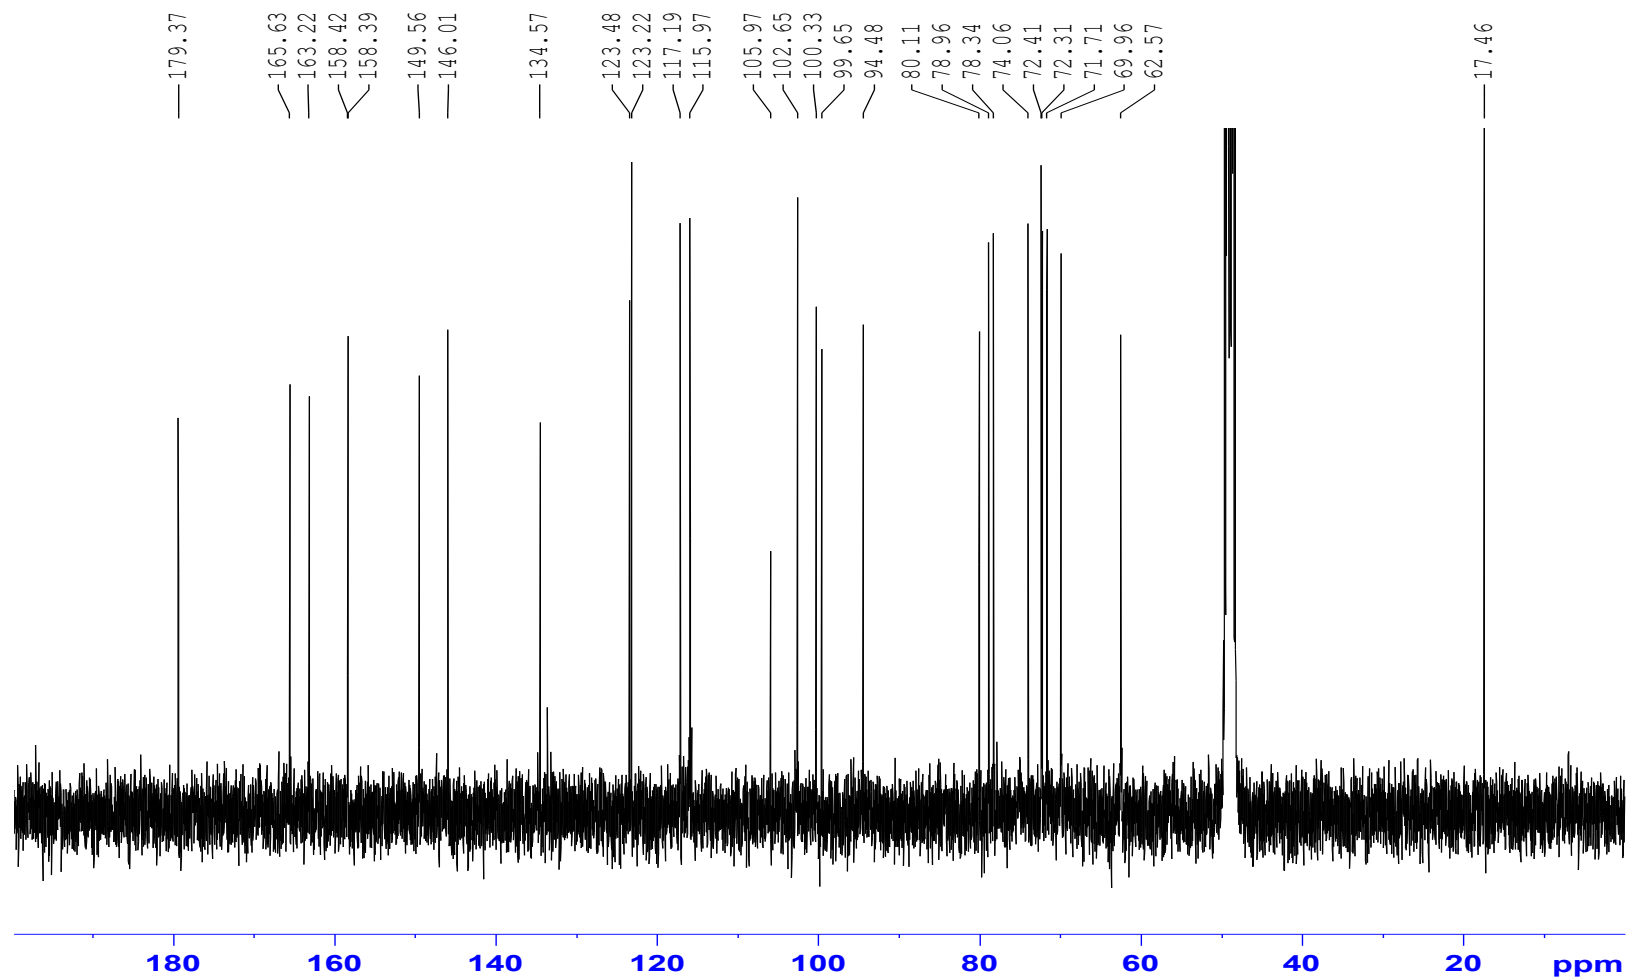

Figure S13. <sup>13</sup>C NMR spectrum of **3** in CD<sub>3</sub>OD (100 MHz).

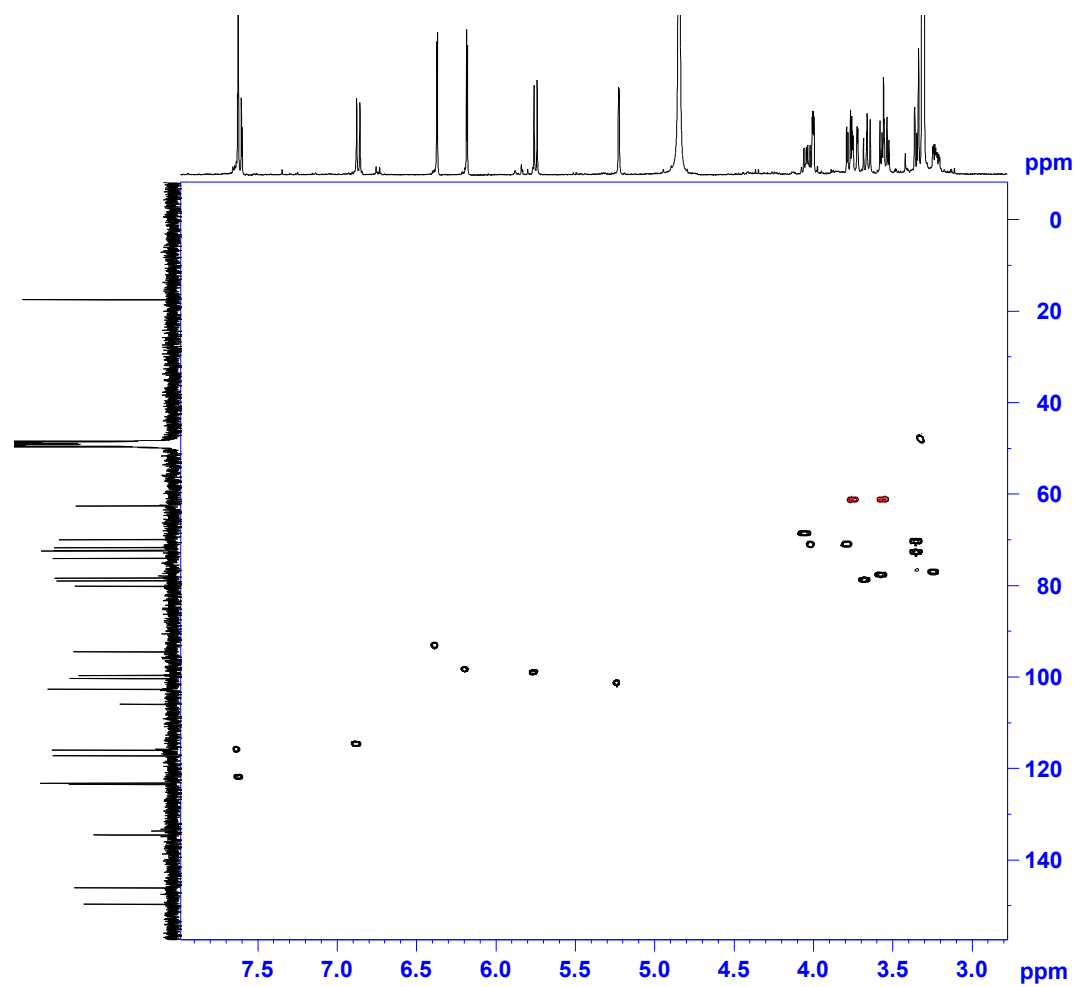

Figure S14. HSQC spectrum of **3** in  $\text{CD}_3\text{OD}$ .

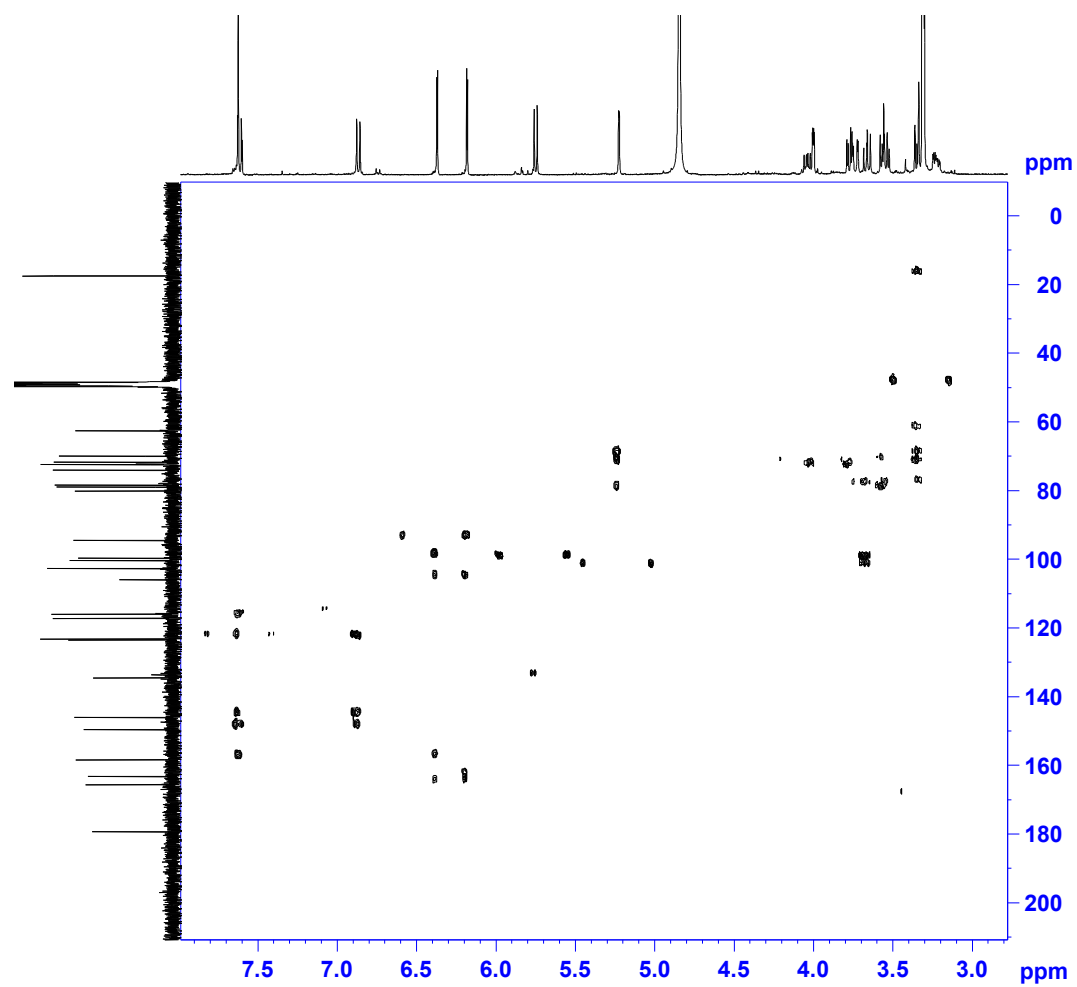

Figure S15. HMBC spectrum of **3** in  $\text{CD}_3\text{OD}$ .



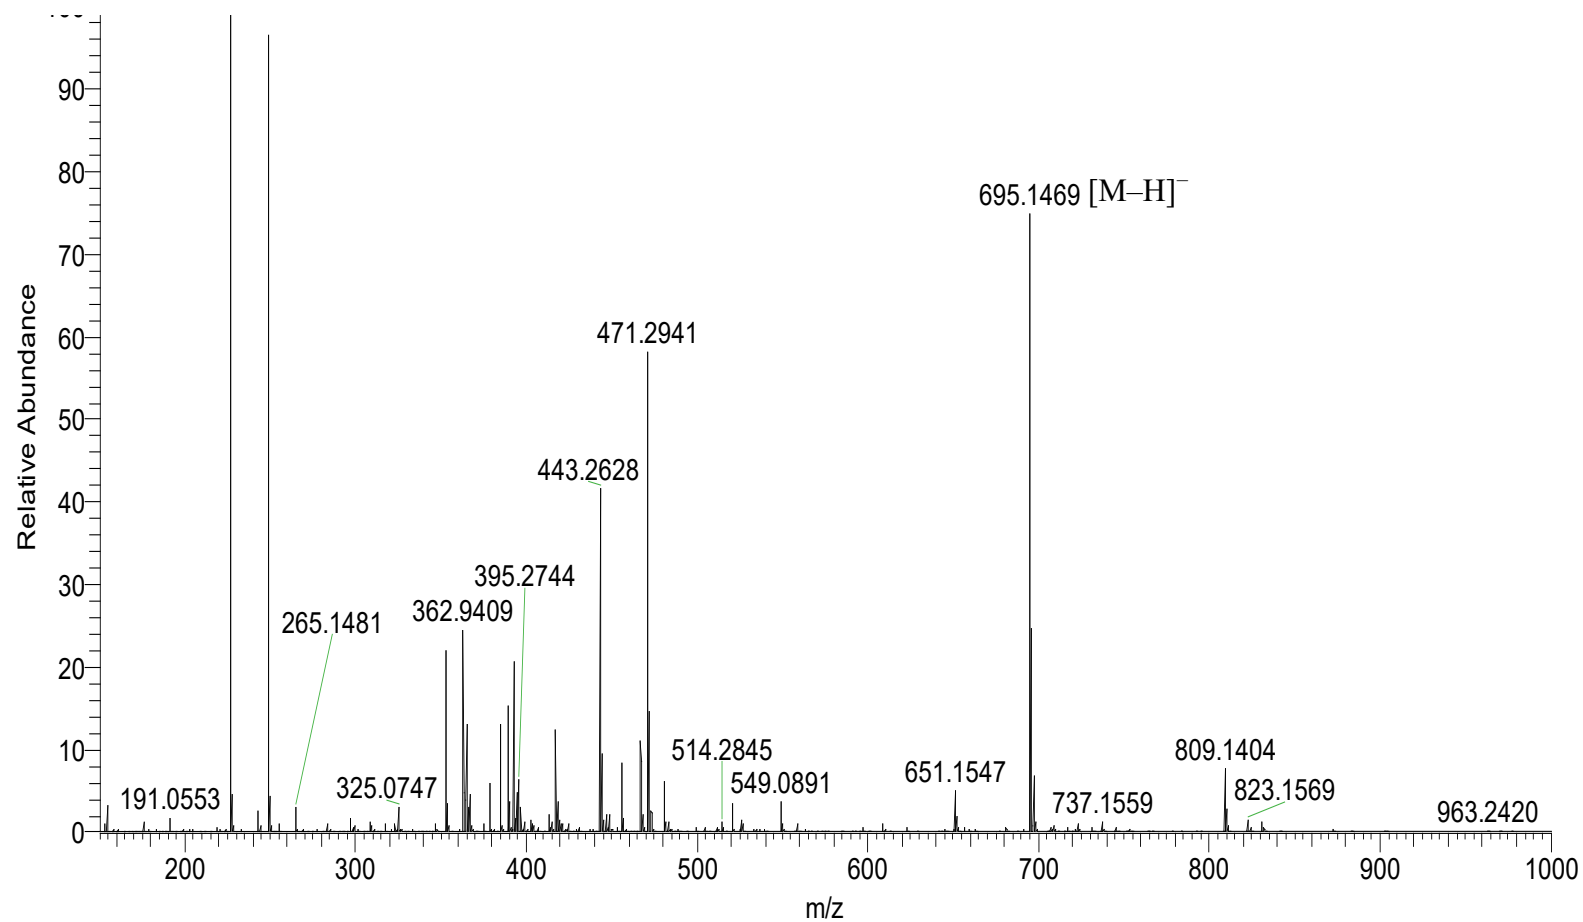

**Figure S16.** HRESIMS spectrum of **4** (negative mode).

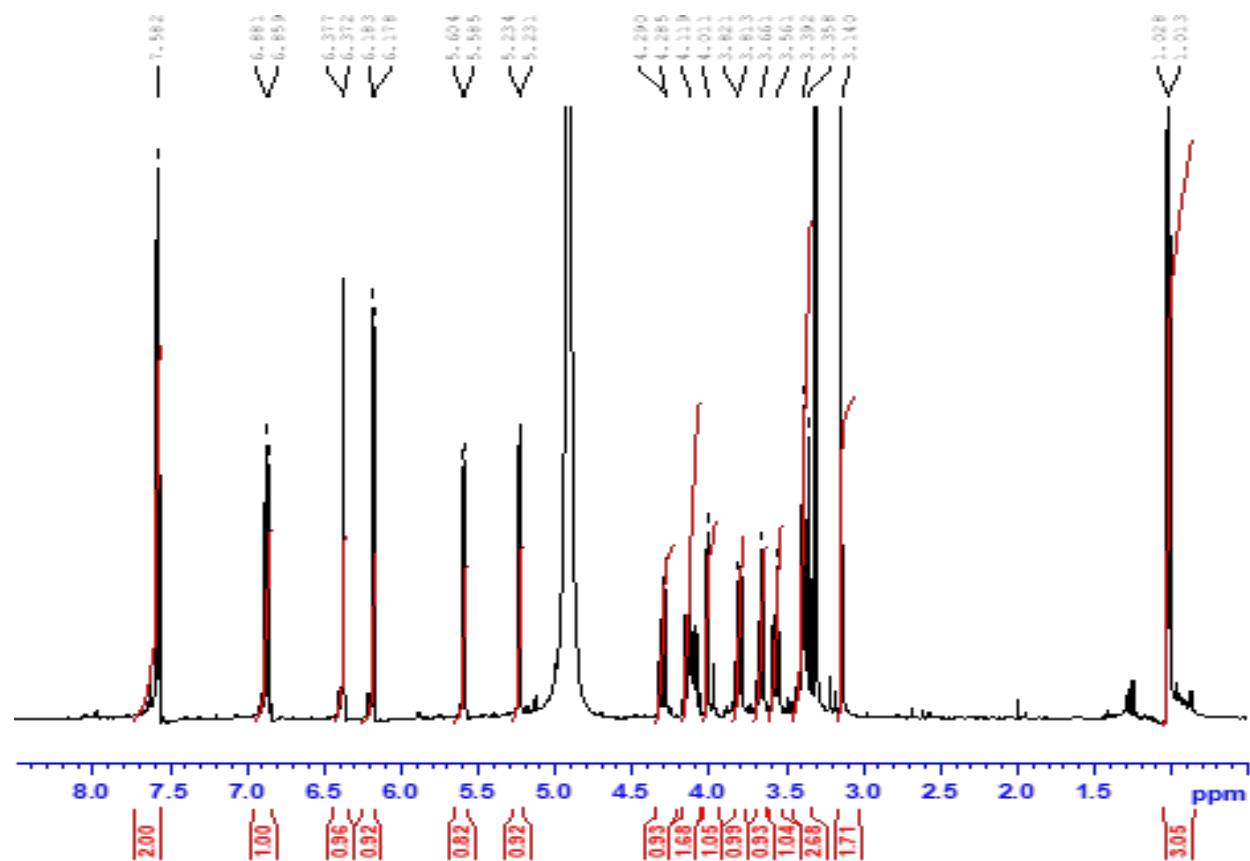

**Figure S17.** <sup>1</sup>H NMR spectrum of **4** in CD<sub>3</sub>OD (400 MHz).

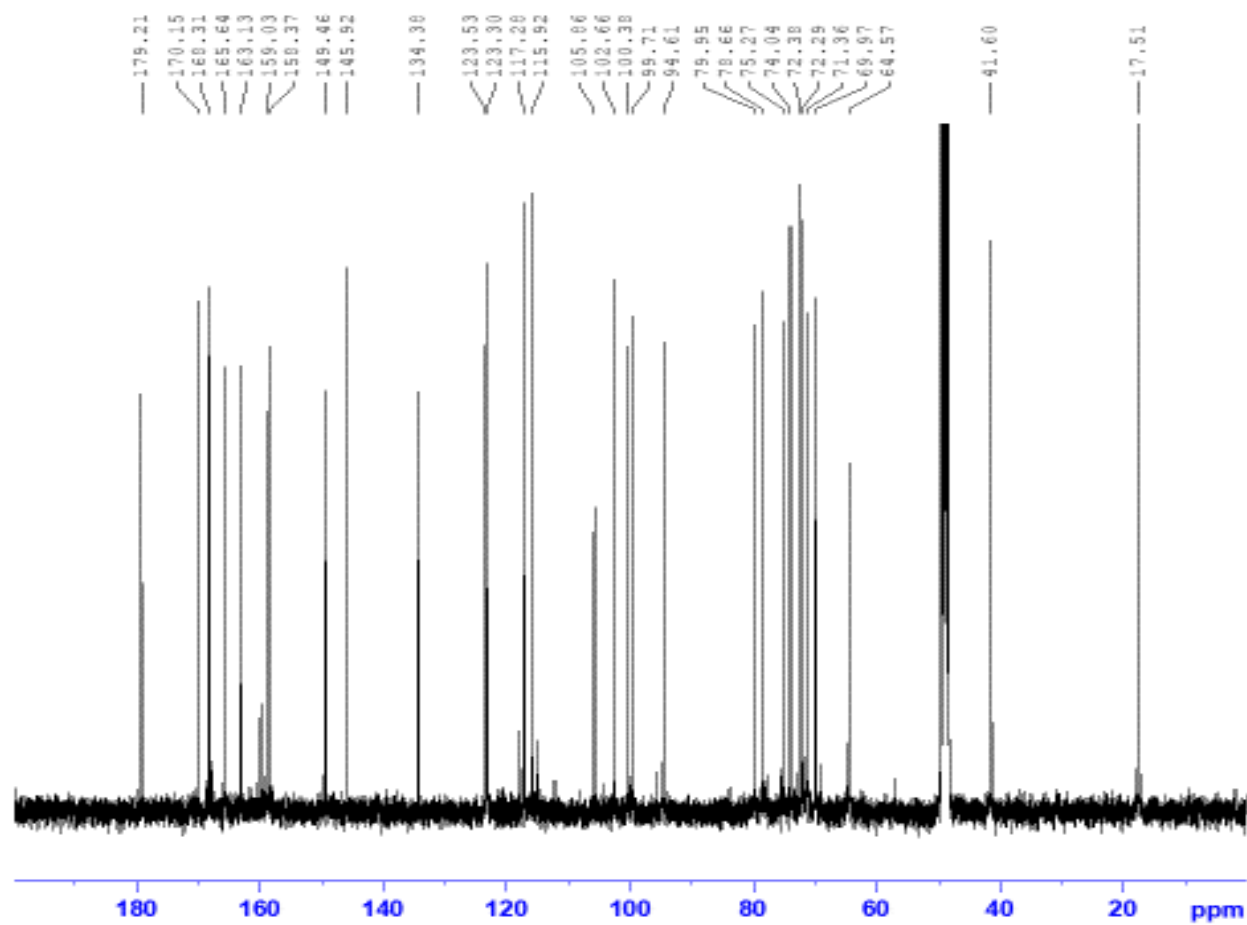

**Figure S18.**  $^{13}\text{C}$  NMR spectrum of **4** in  $\text{CD}_3\text{OD}$  (100 MHz).

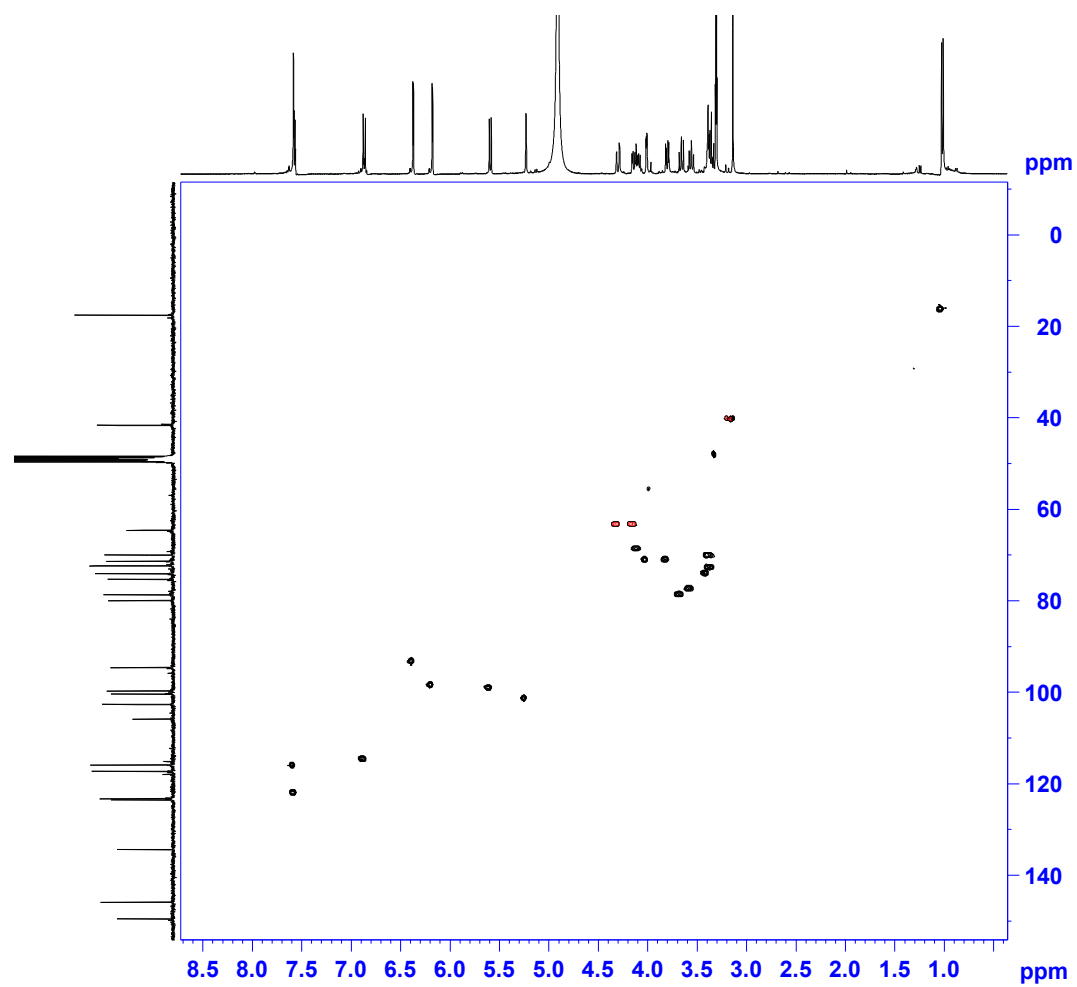

**Figure S19.** HSQC spectrum of **4** in  $\text{CD}_3\text{OD}$ .

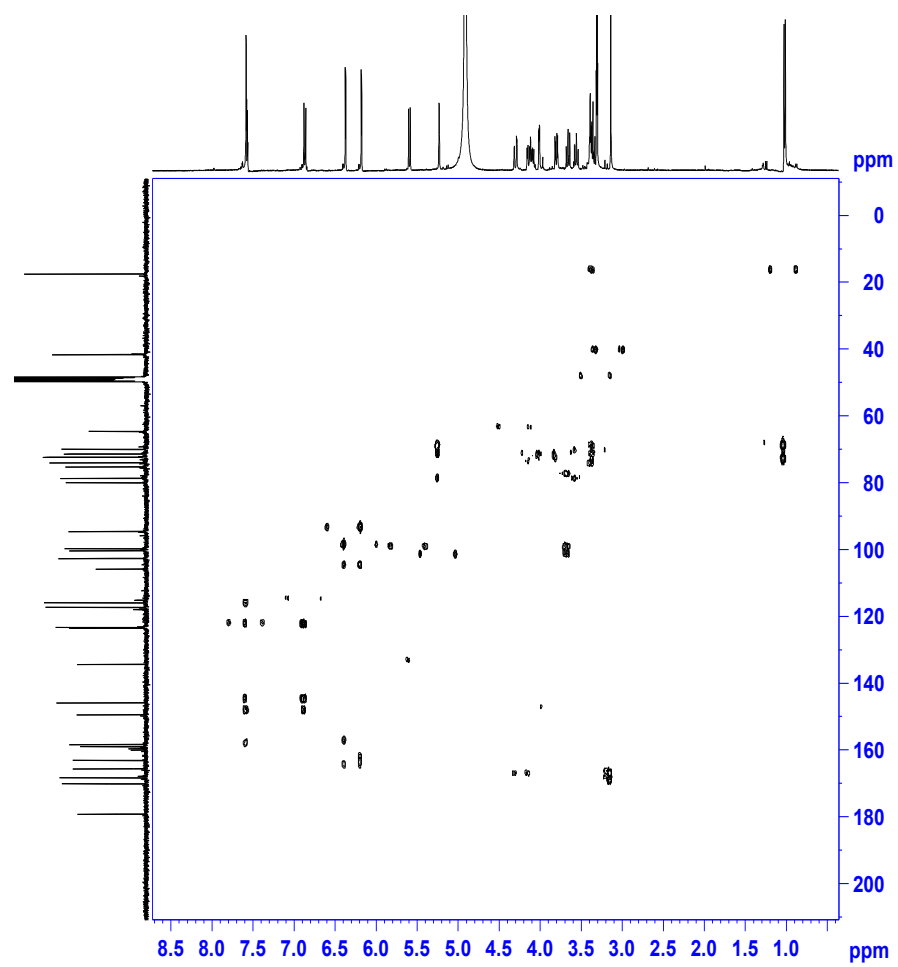

**Figure S20.** HMBC spectrum of **4** in CD<sub>3</sub>OD.

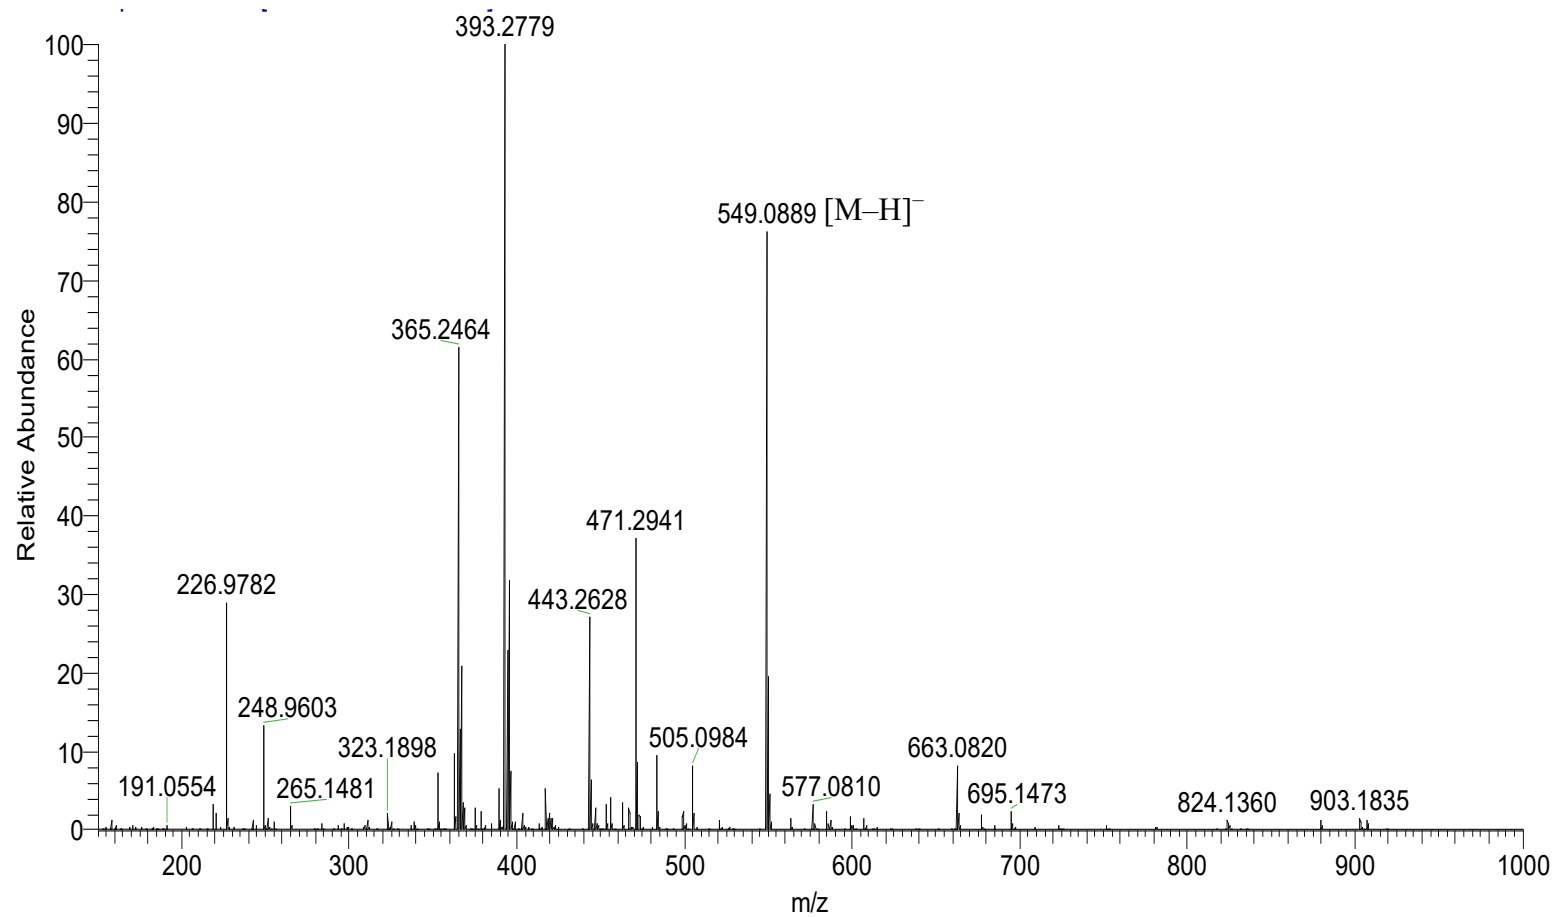

**Figure S21.** HRESIMS spectrum of **5** (negative mode).

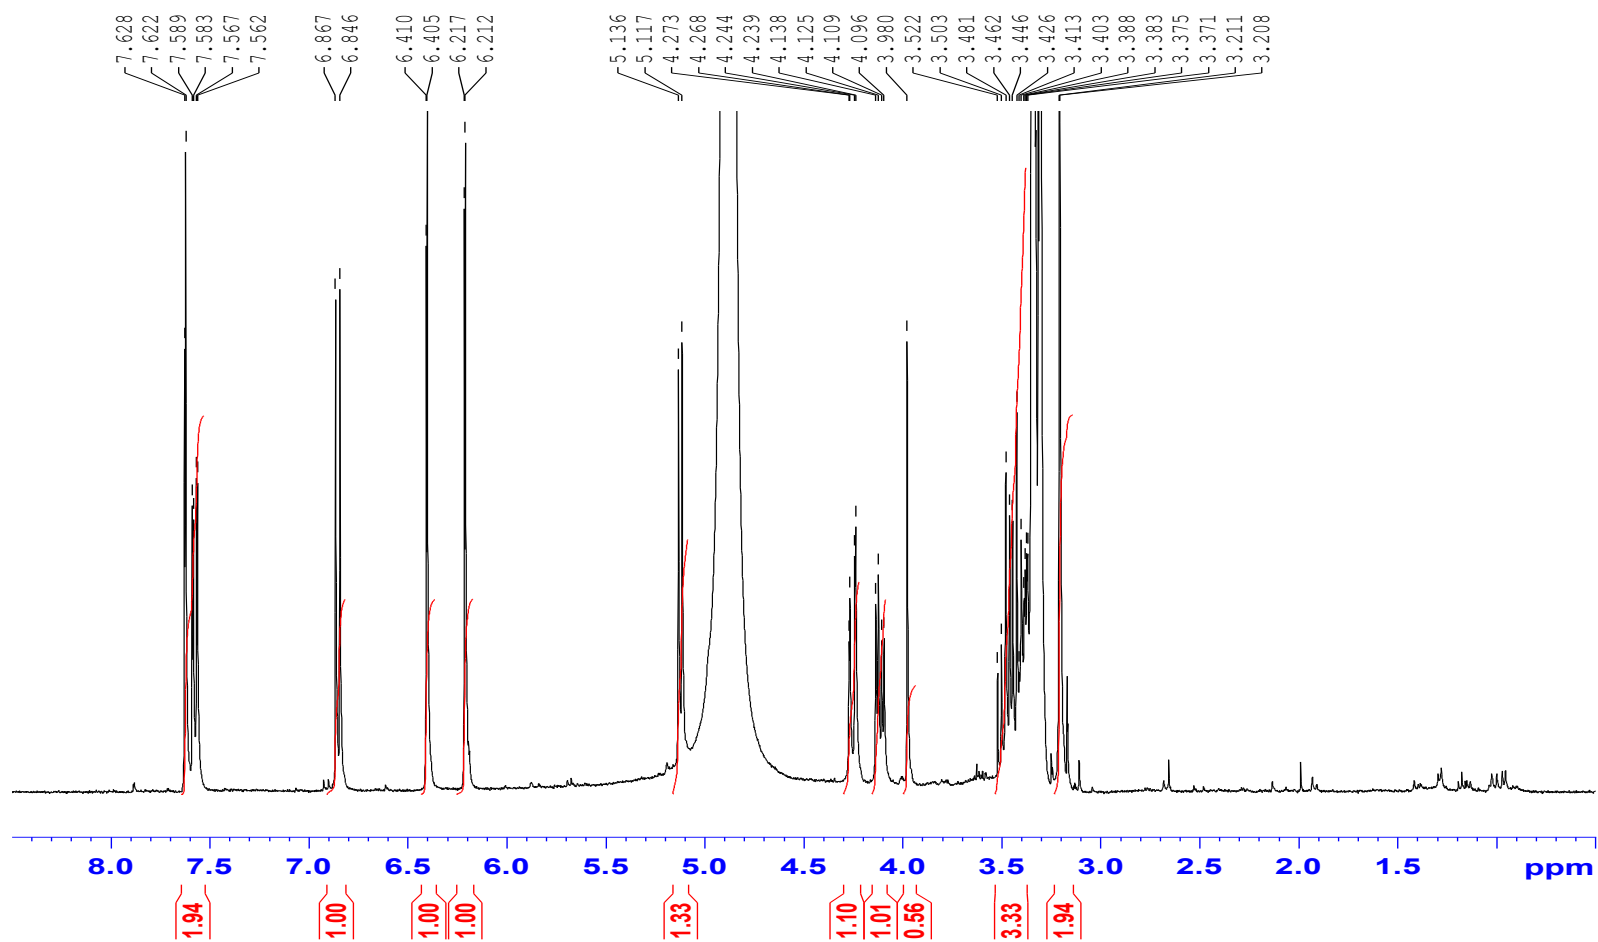

Figure S22. <sup>1</sup>H NMR spectrum of **5** in CD<sub>3</sub>OD (400 MHz).

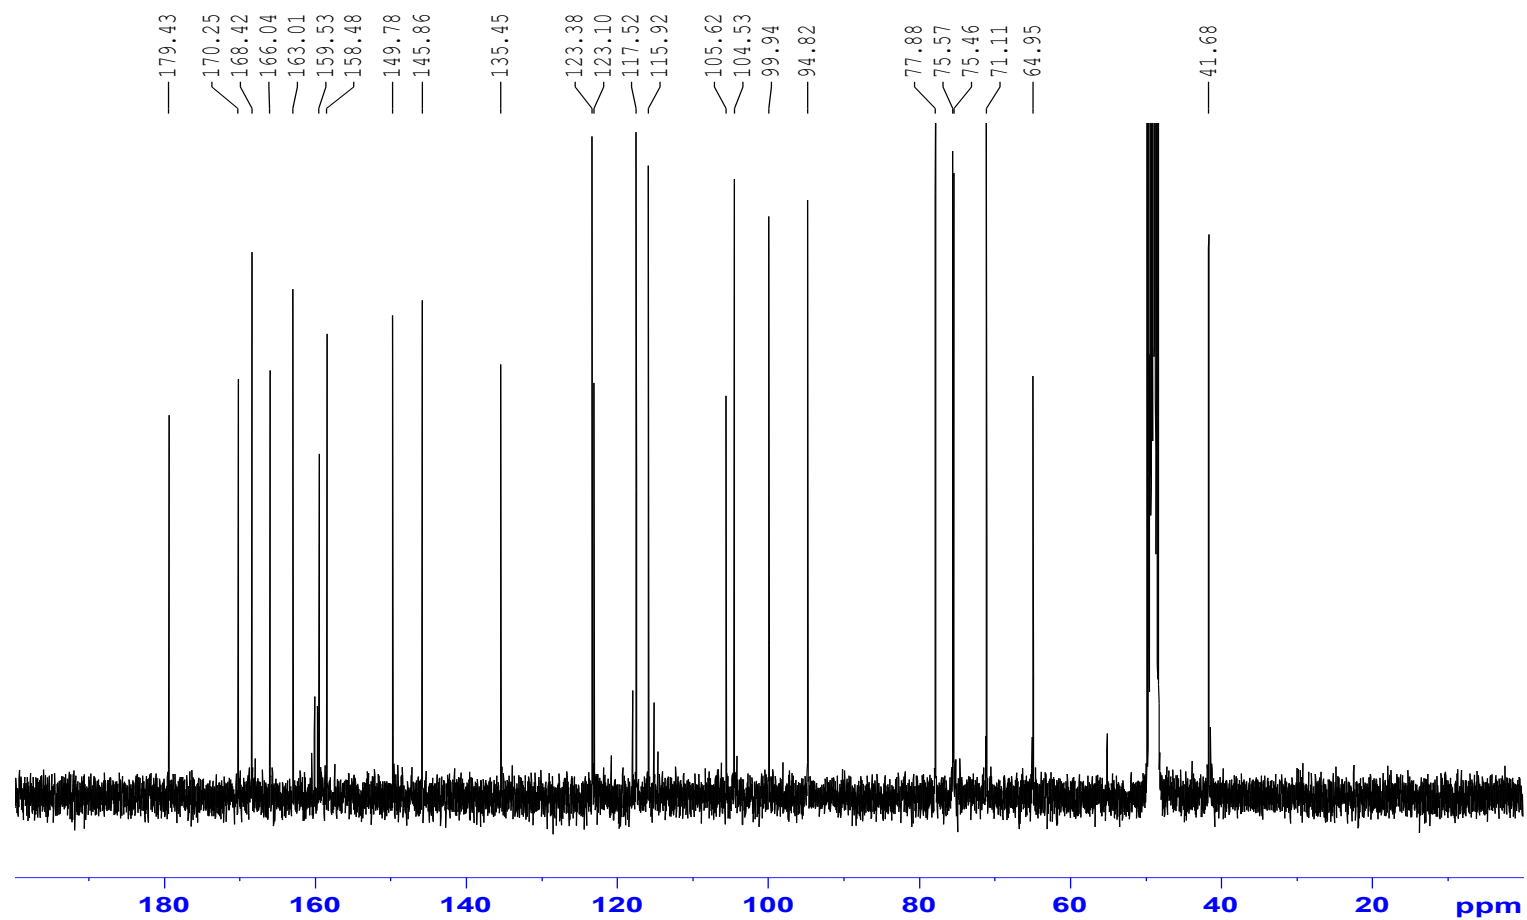

Figure S23.  $^{13}\text{C}$  NMR spectrum of **5** in  $\text{CD}_3\text{OD}$  (100 MHz).



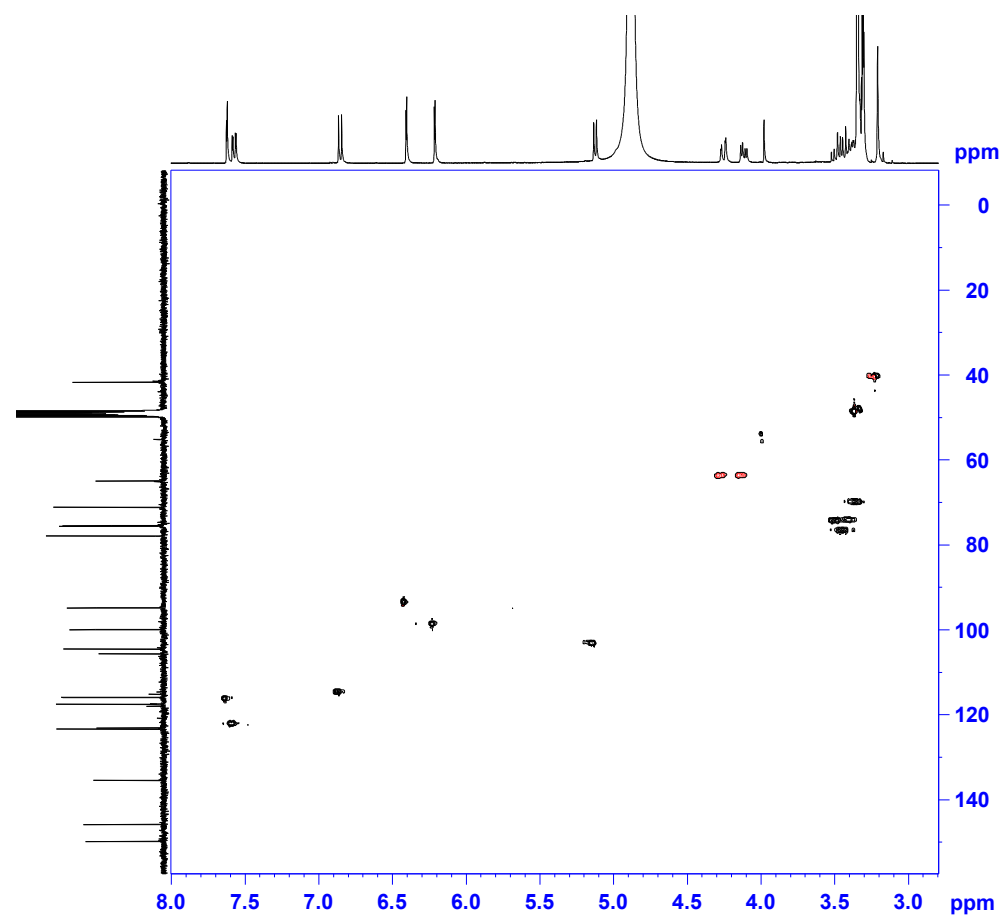

**Figure S24.** HSQC spectrum of **5** in CD<sub>3</sub>OD.

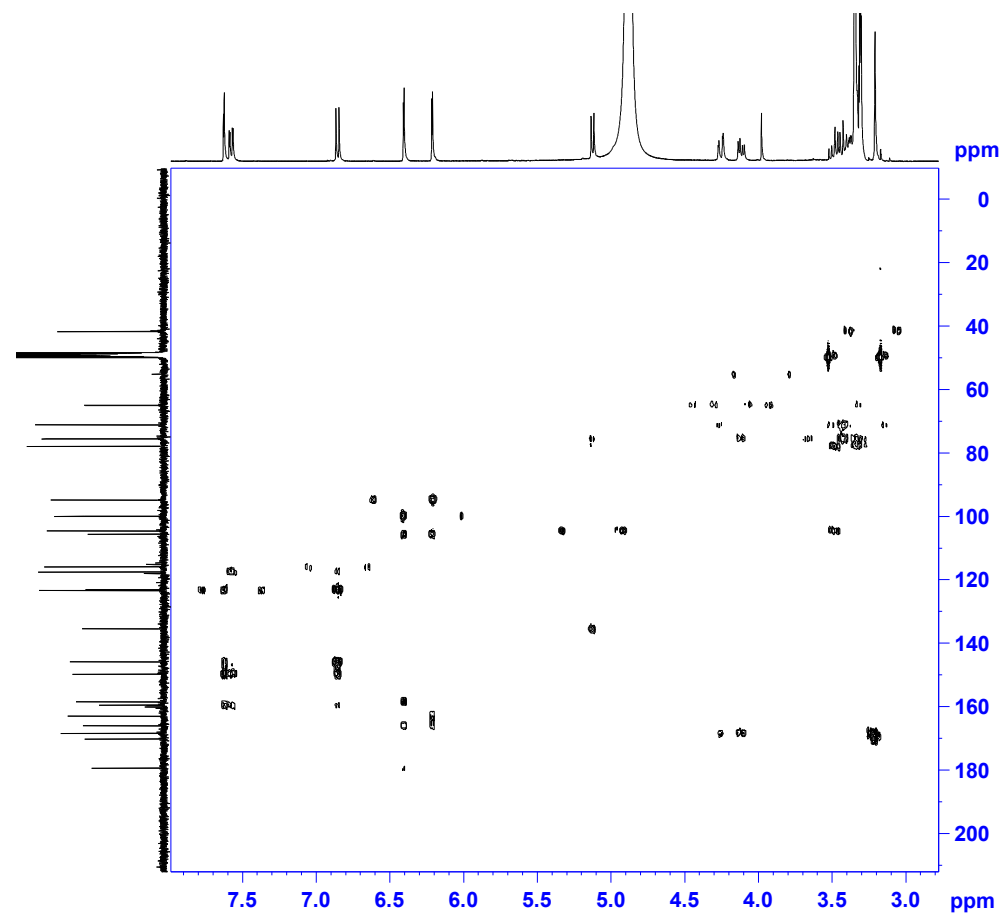

Figure S25. HMBC spectrum of **5** in CD<sub>3</sub>OD.

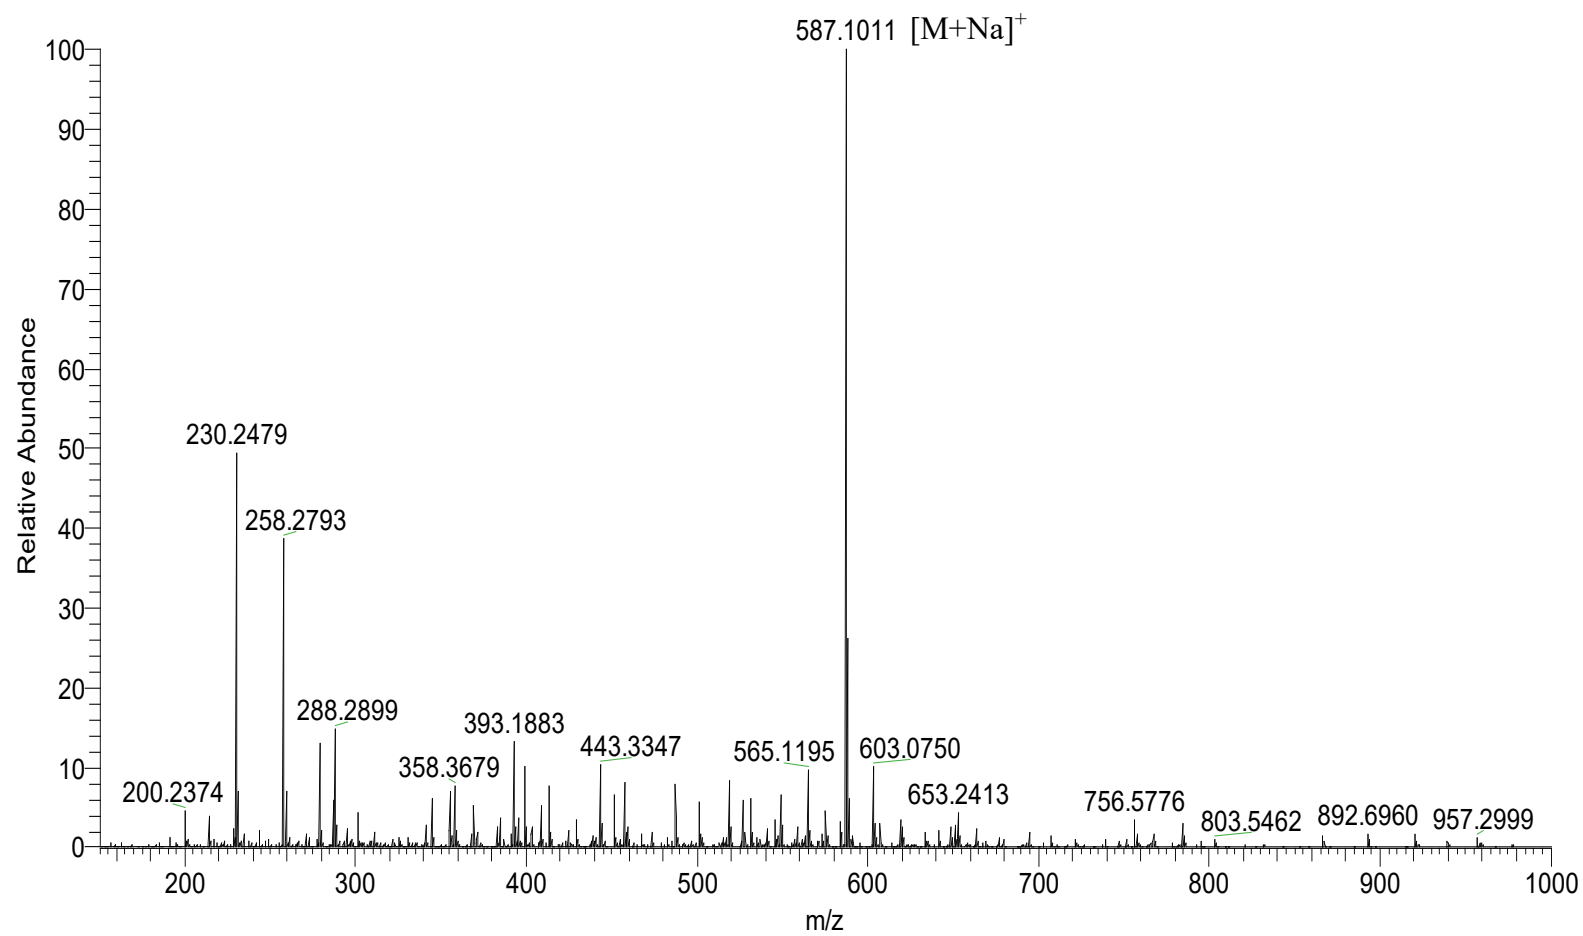

**Figure S26.** HRESIMS spectrum of **6** (positive mode).

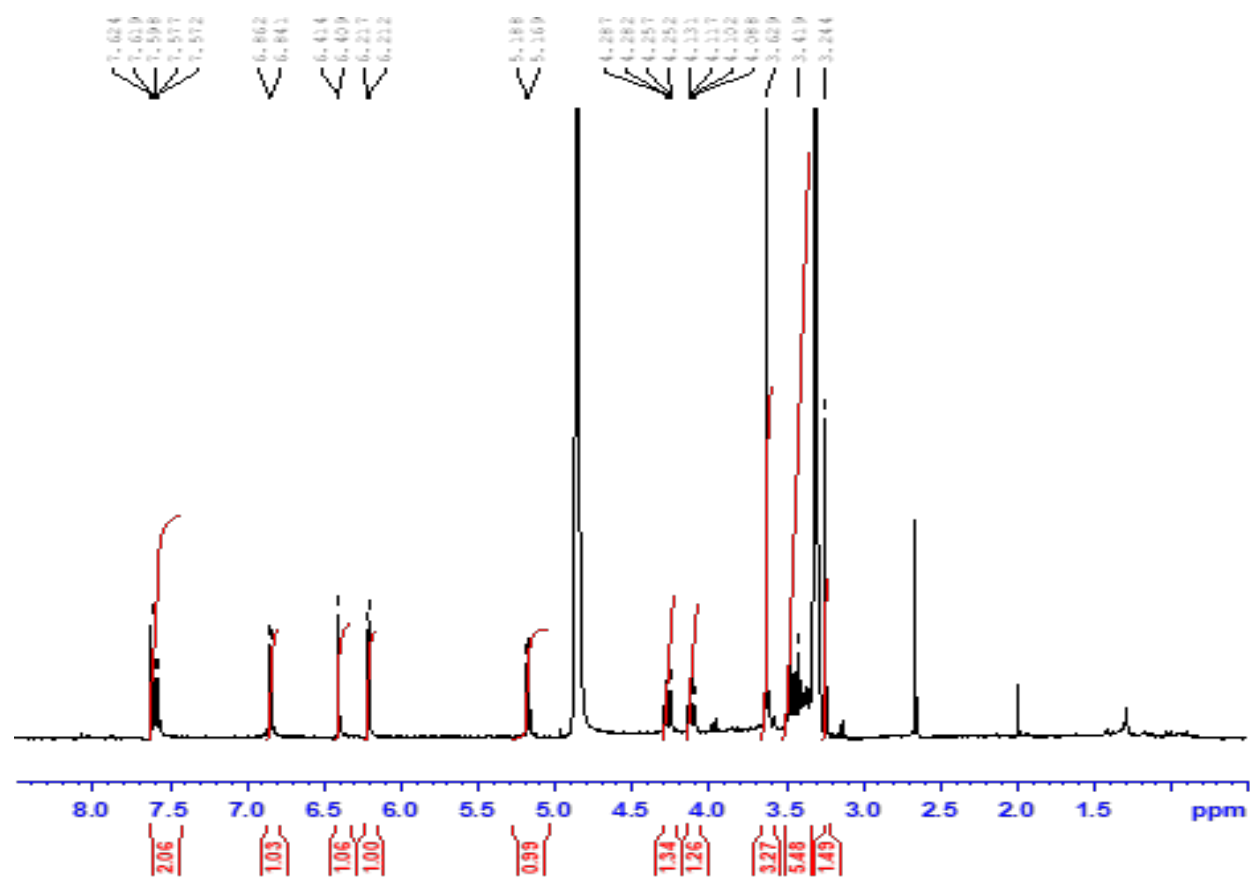

**Figure S27.**  $^1\text{H}$  NMR spectrum of **6** in  $\text{CD}_3\text{OD}$  (400 MHz).

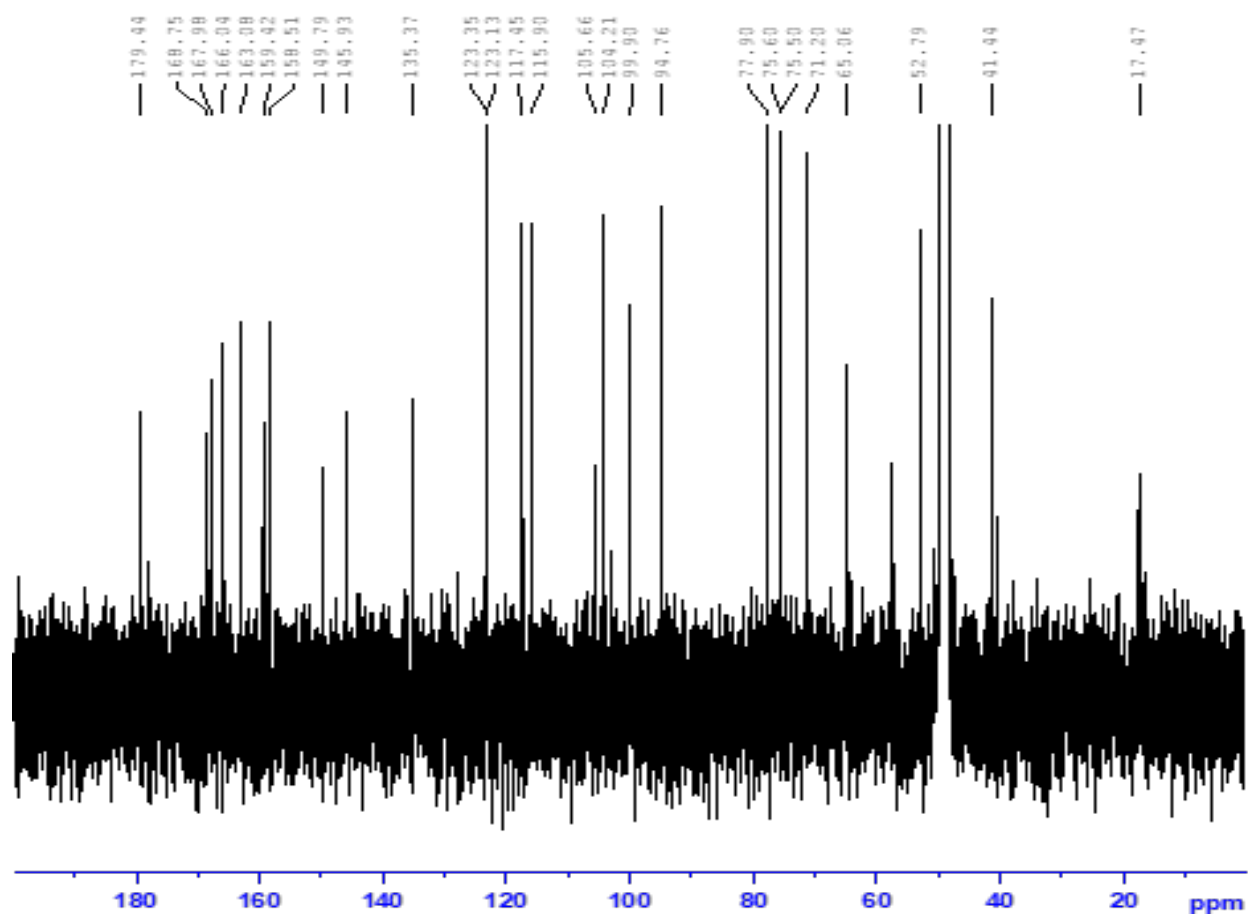

**Figure S28.** <sup>13</sup>C NMR spectrum of **6** in CD<sub>3</sub>OD (100 MHz).

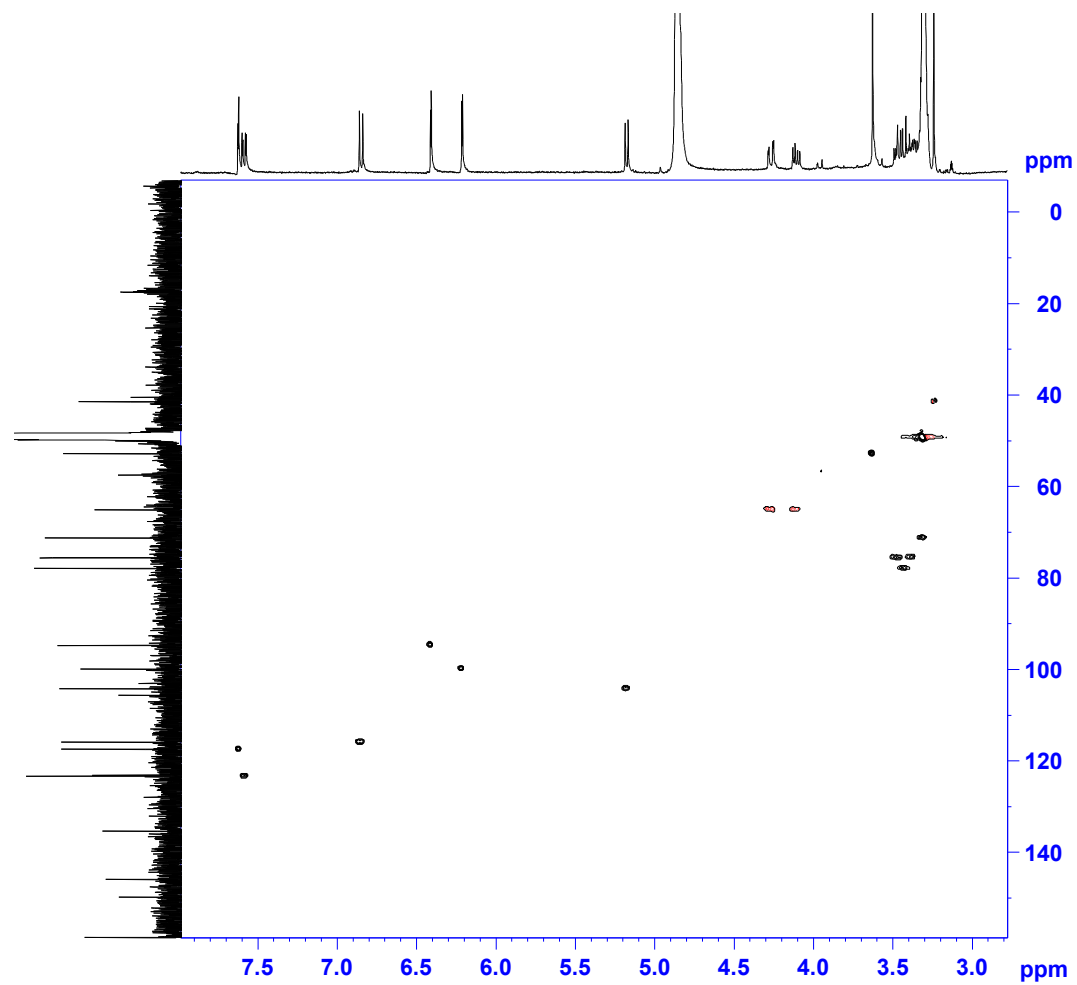

**Figure S29.** HSQC spectrum of **6** in CD<sub>3</sub>OD.

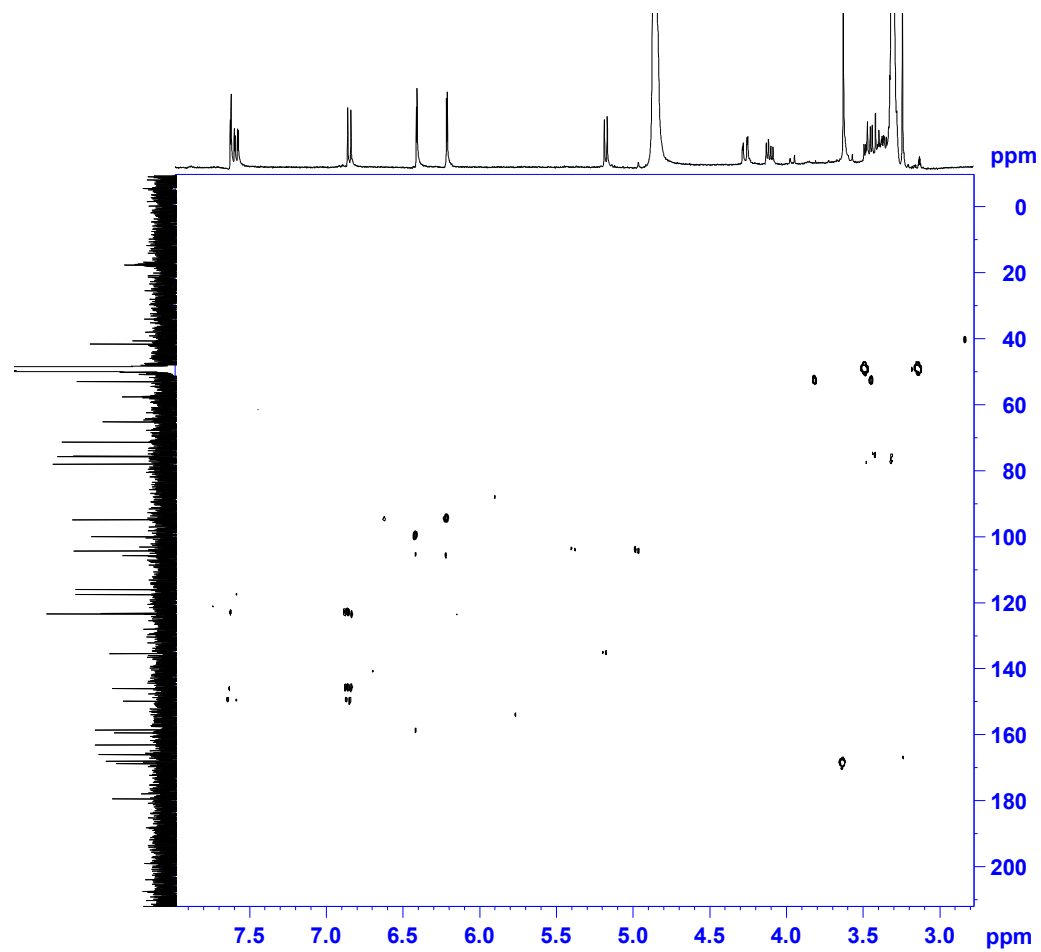

**Figure S30.** HMBC spectrum of **6** in CD<sub>3</sub>OD.

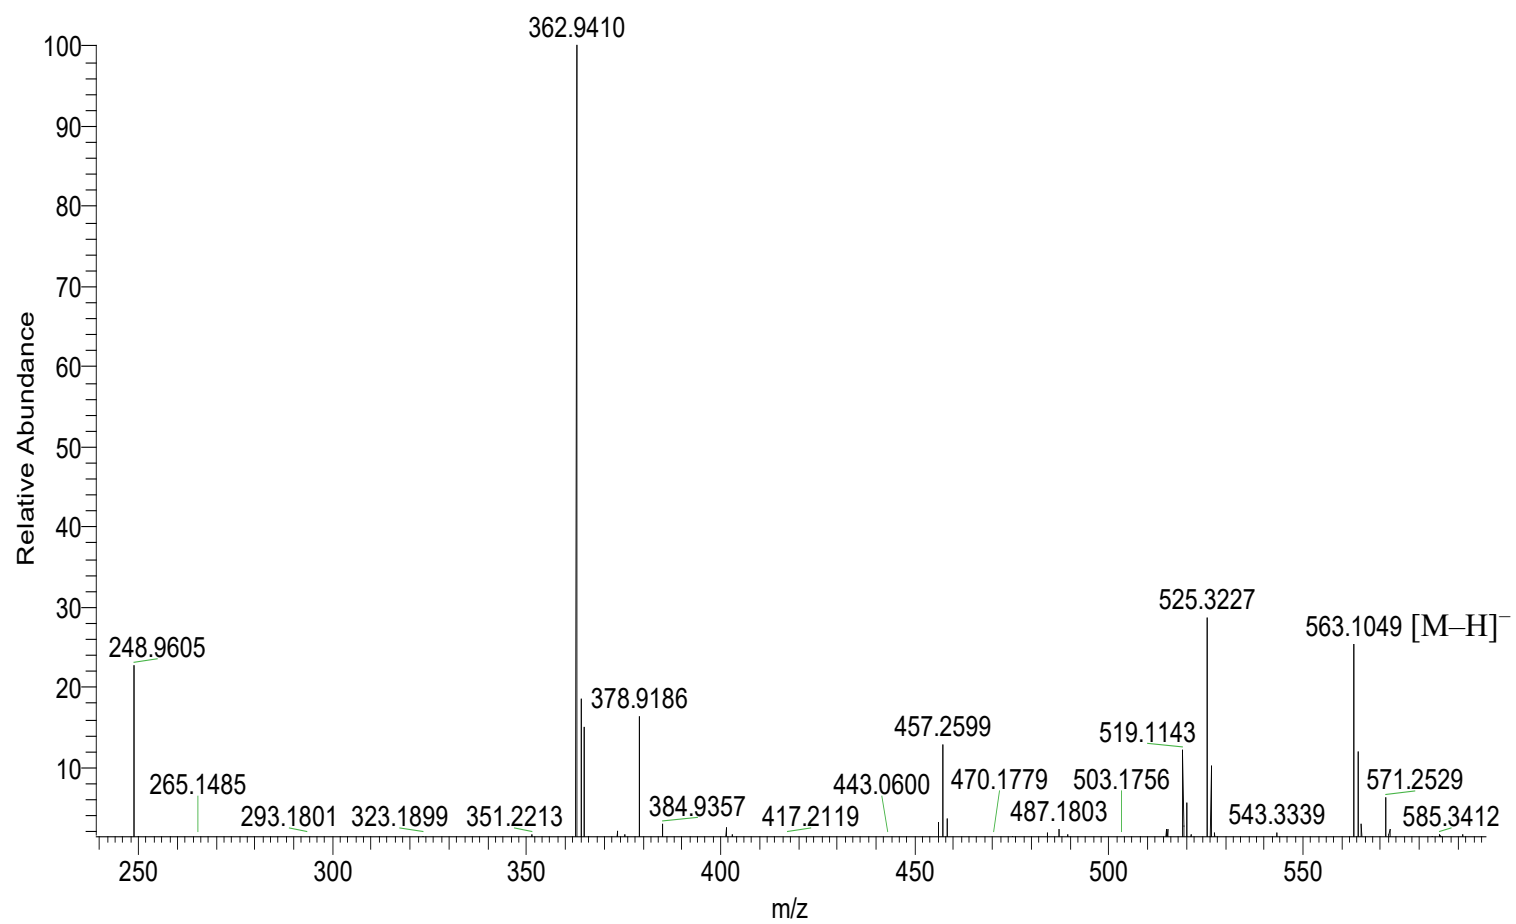

**Figure S31.** HRESIMS spectrum of **7** (negative mode).



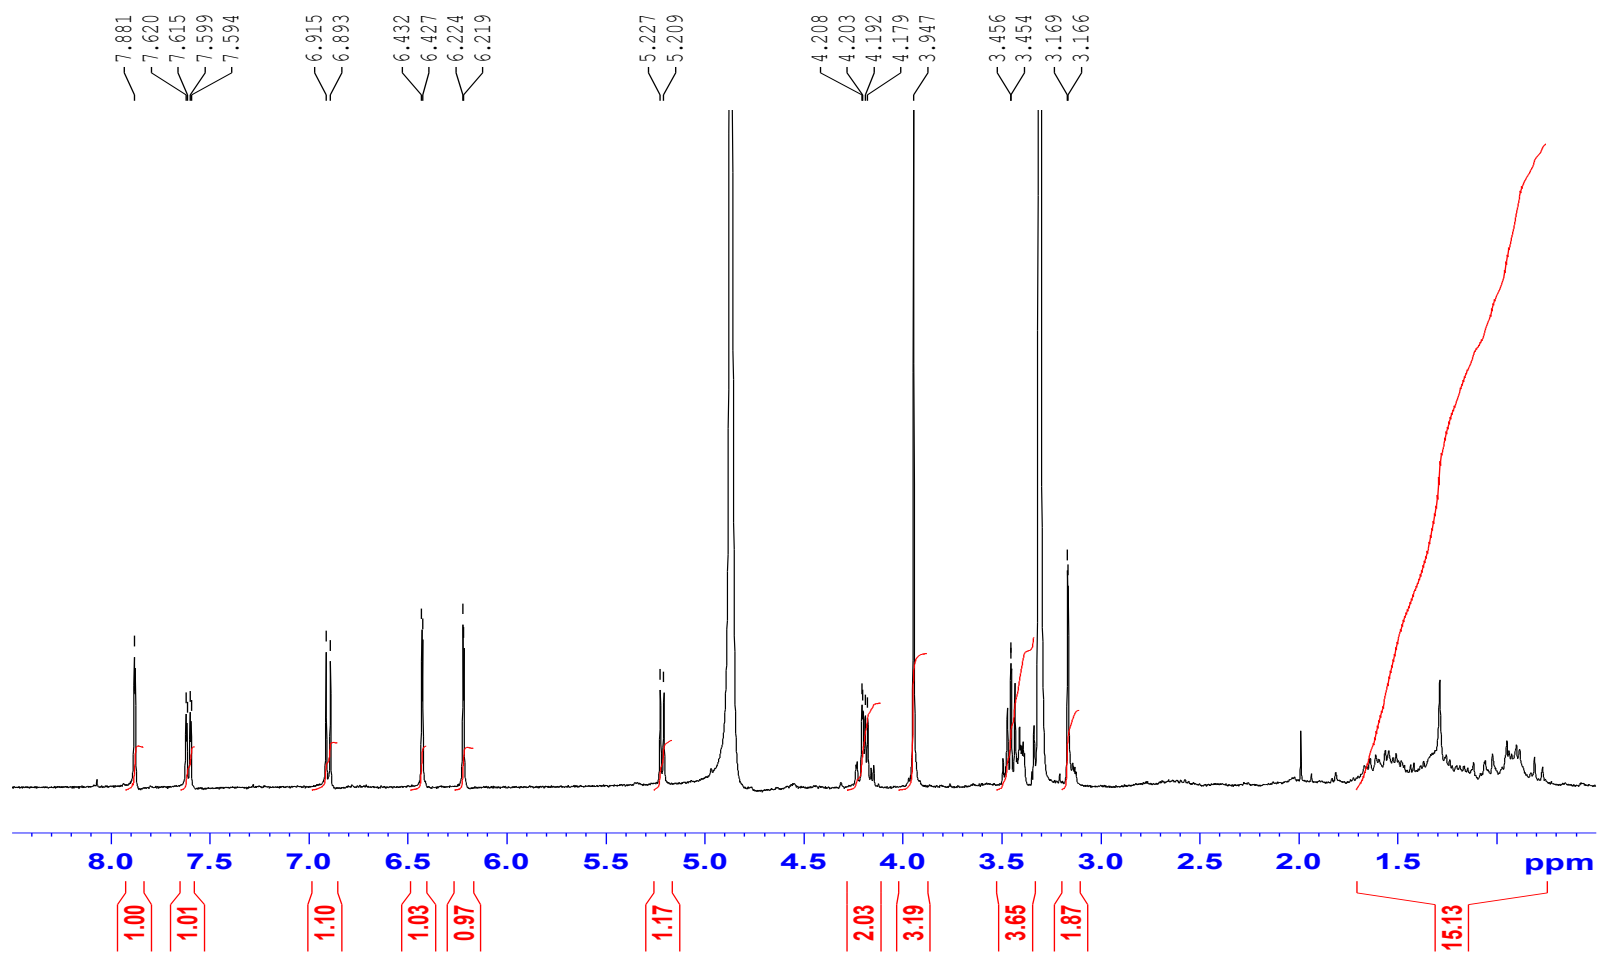

**Figure S32.**  $^1\text{H}$  NMR spectrum of **7** in  $\text{CD}_3\text{OD}$  (400 MHz).

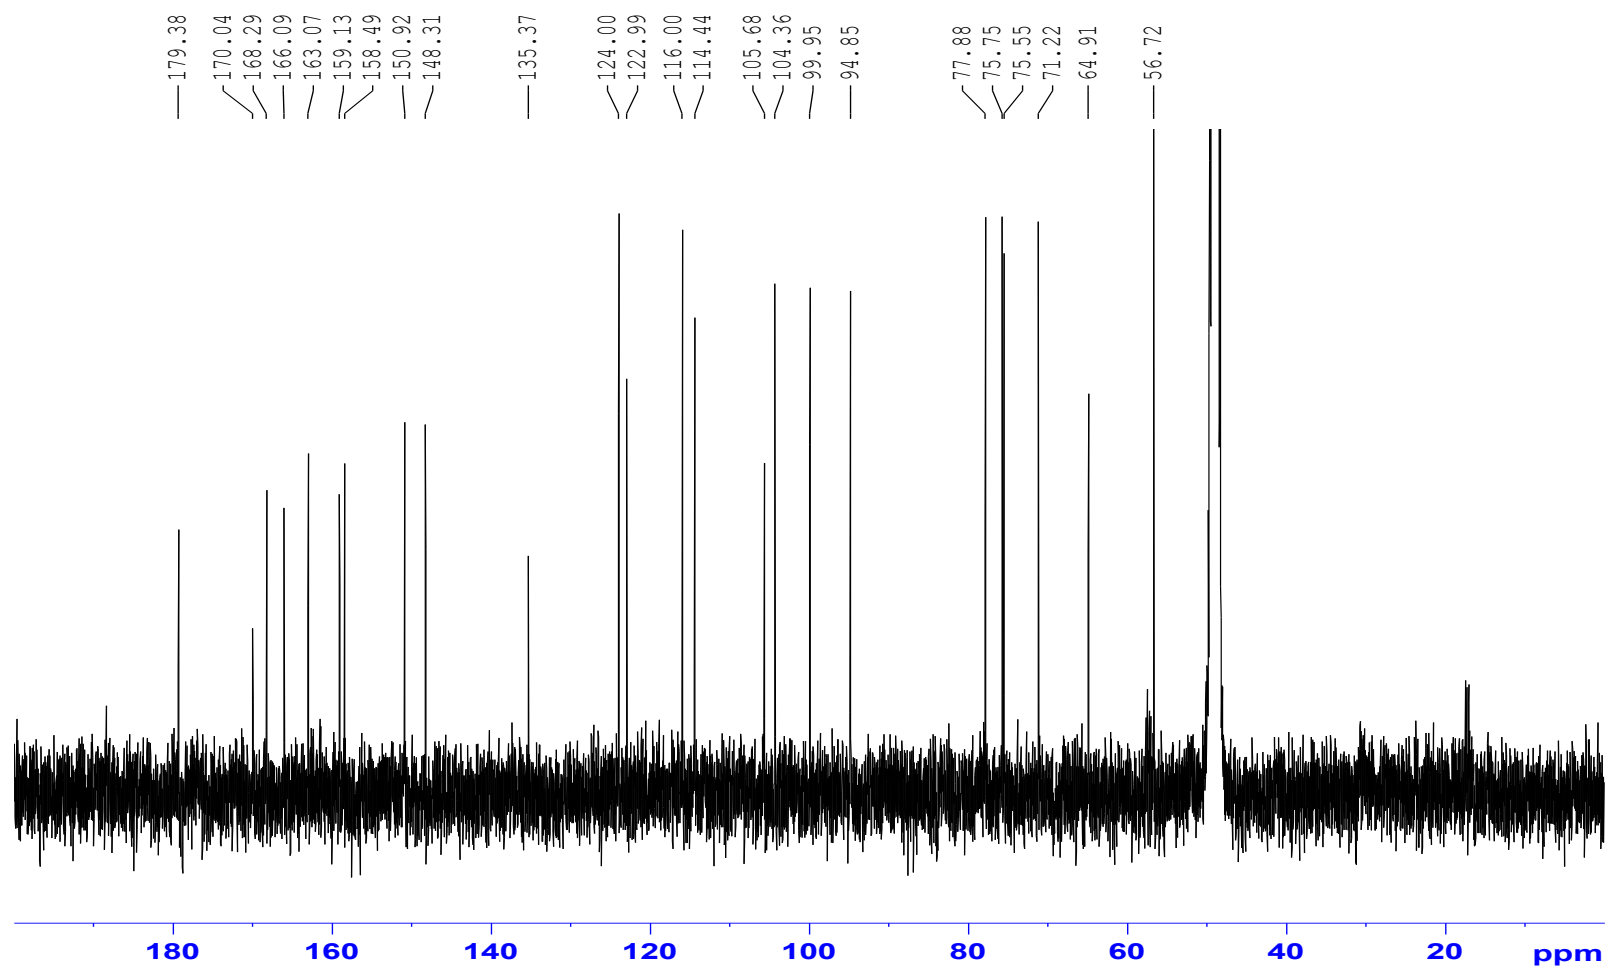

Figure S33.  $^{13}\text{C}$  NMR spectrum of **7** in  $\text{CD}_3\text{OD}$  (100 MHz).

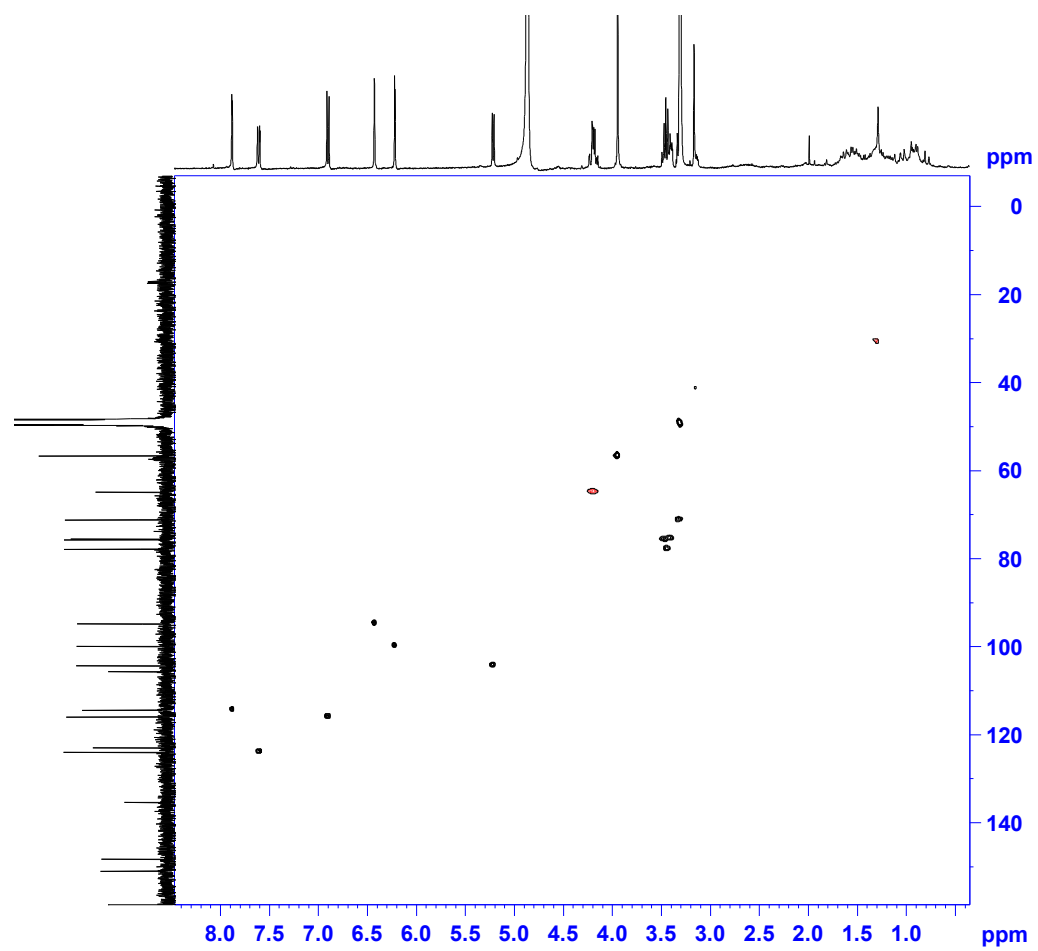

Figure S34. HSQC spectrum of 7 in CD<sub>3</sub>OD.

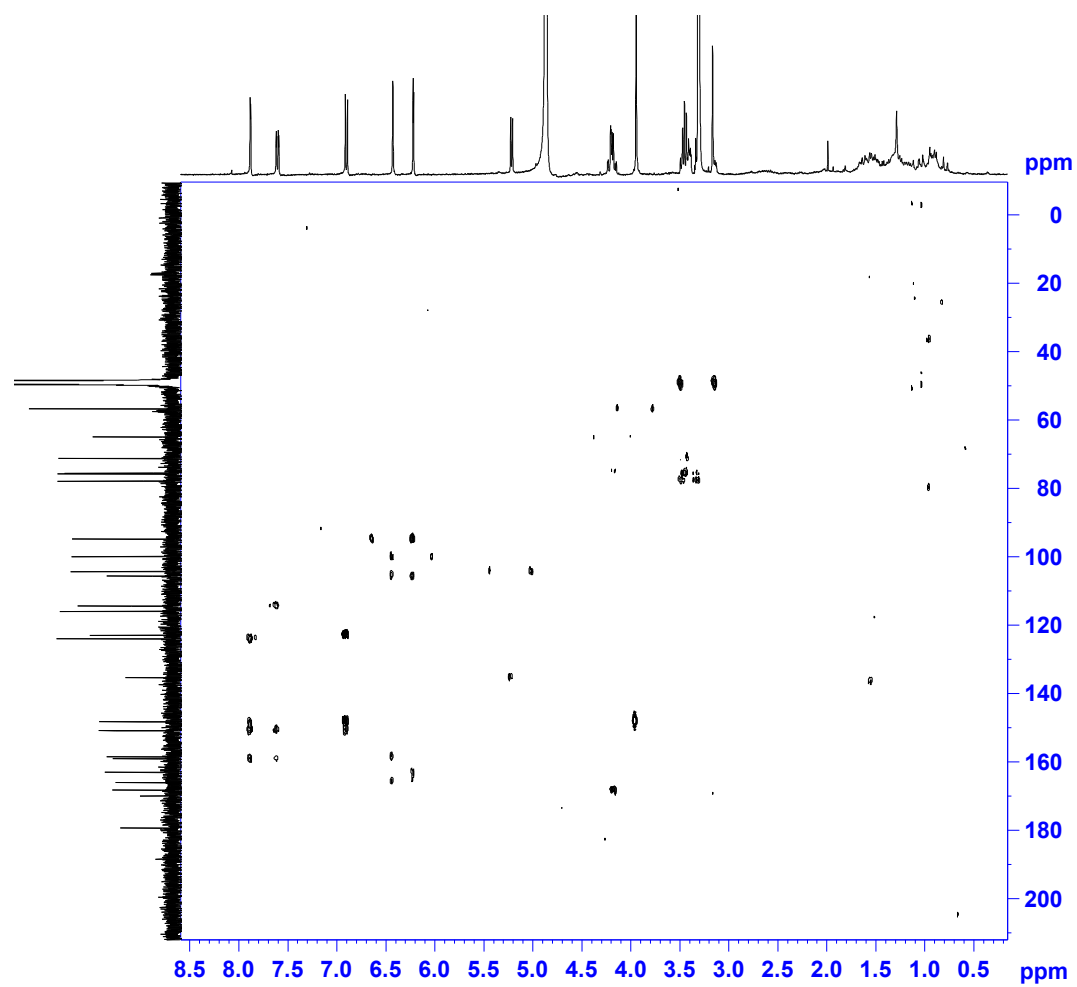

**Figure S35.** HMBC spectrum of **7** in CD<sub>3</sub>OD.

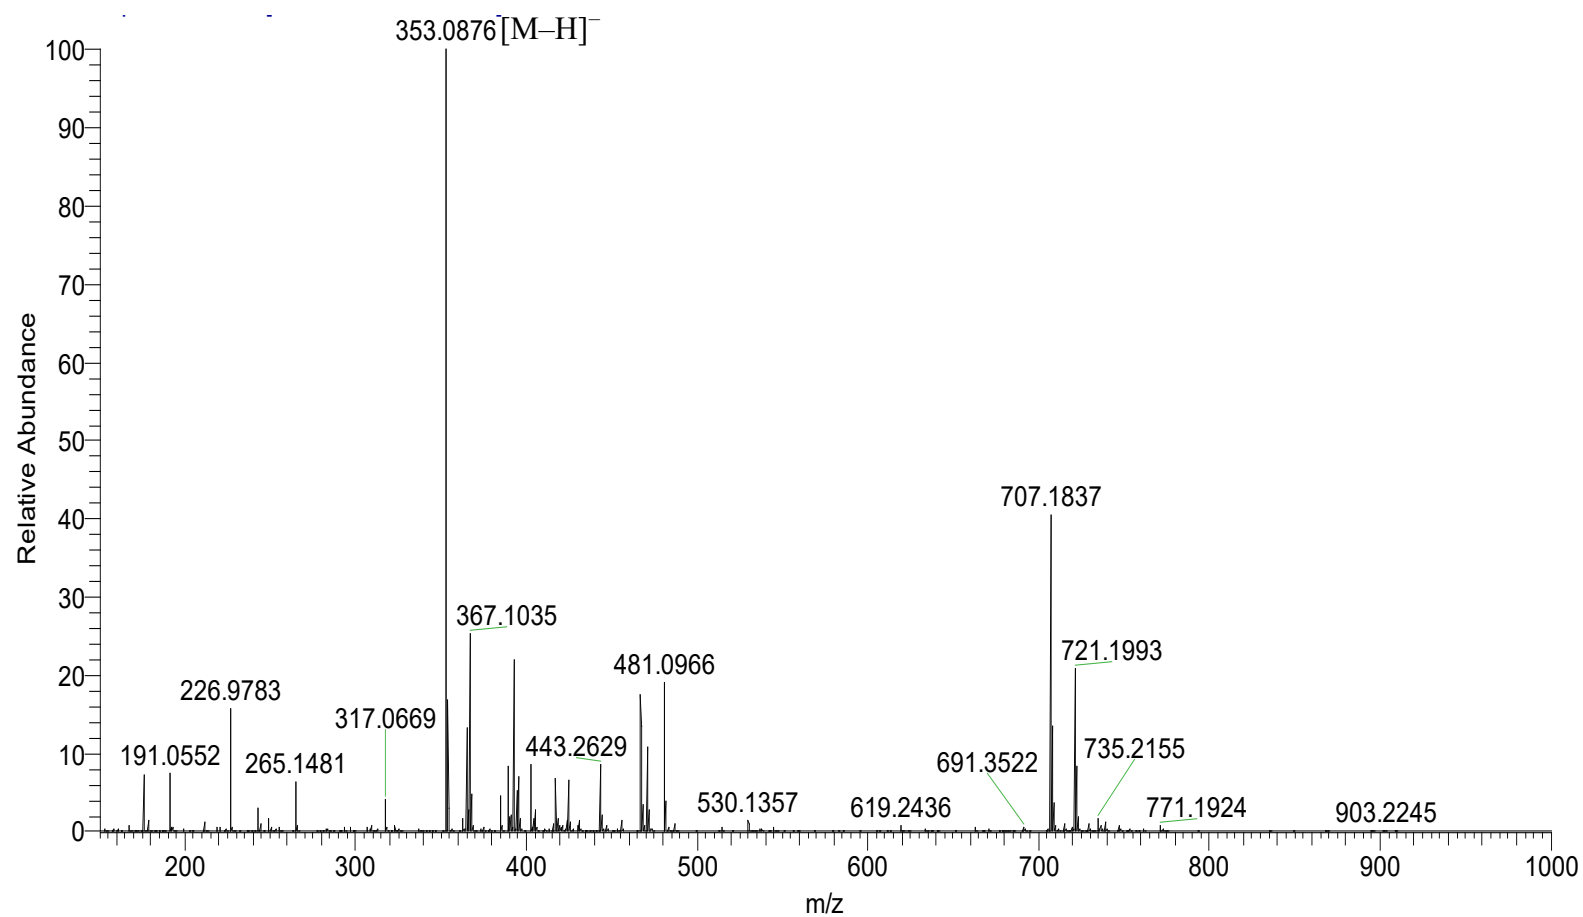

**Figure S36.** HRESIMS spectrum of **8** (negative mode).

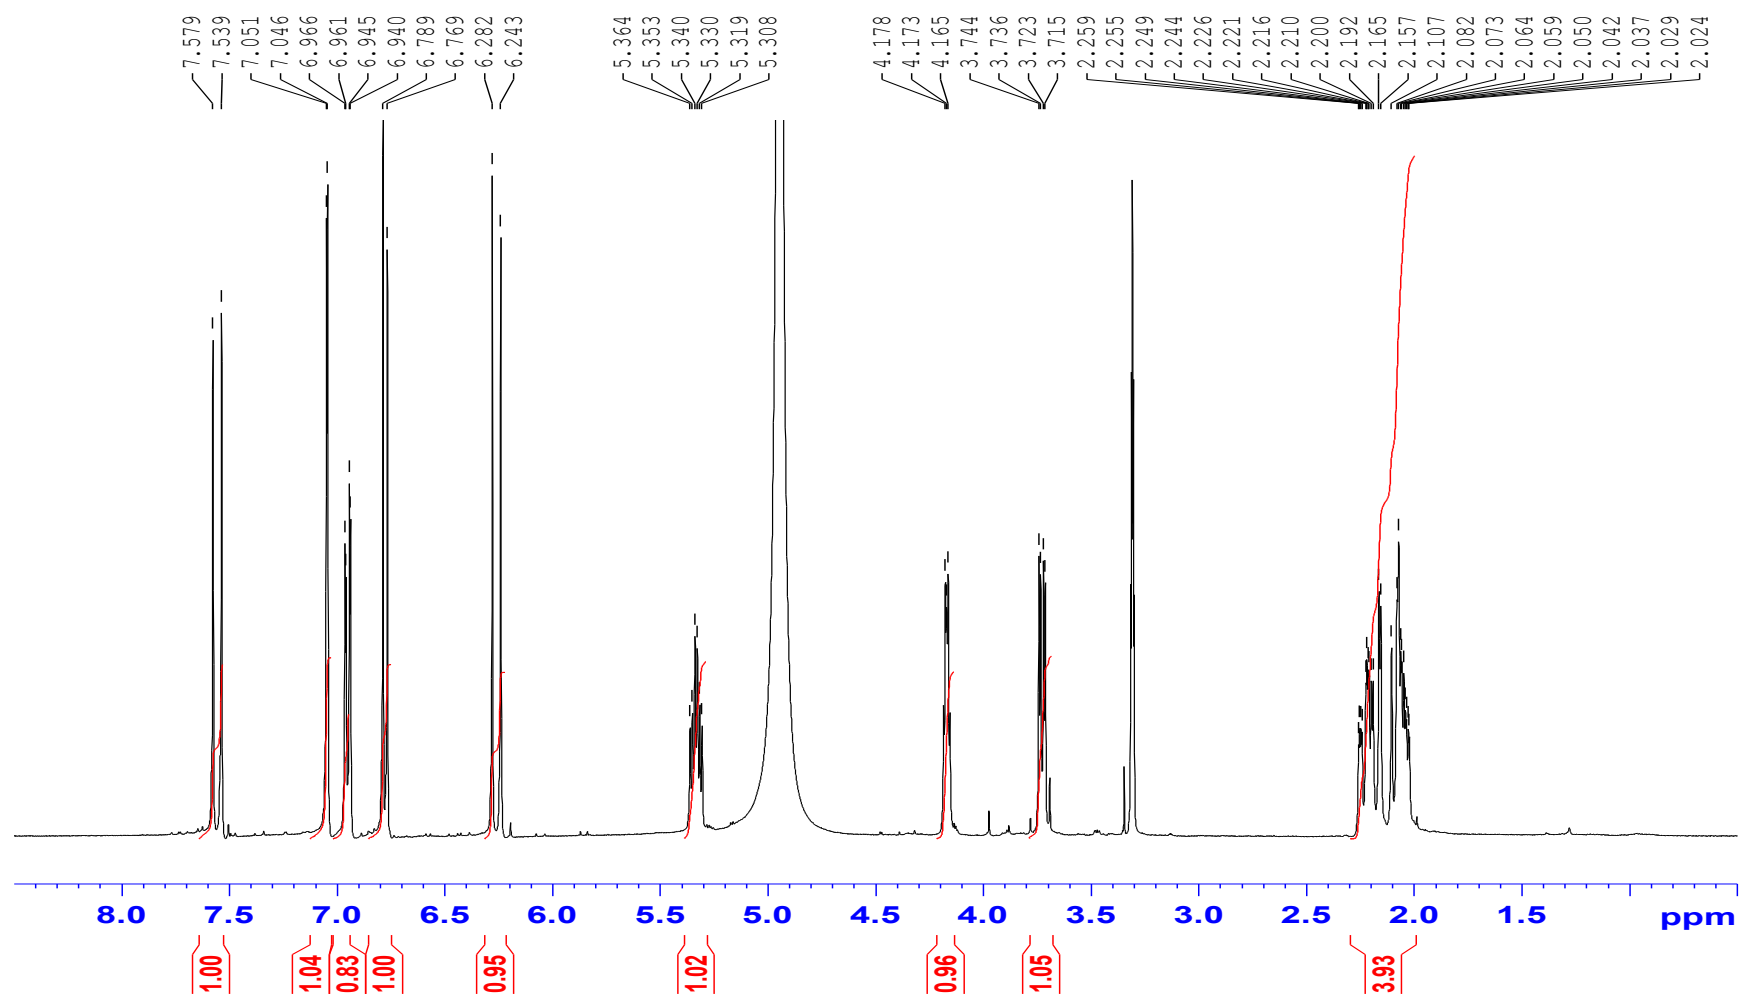

Figure S37.  $^1\text{H}$  NMR spectrum of **8** in  $\text{CD}_3\text{OD}$  (400 MHz).

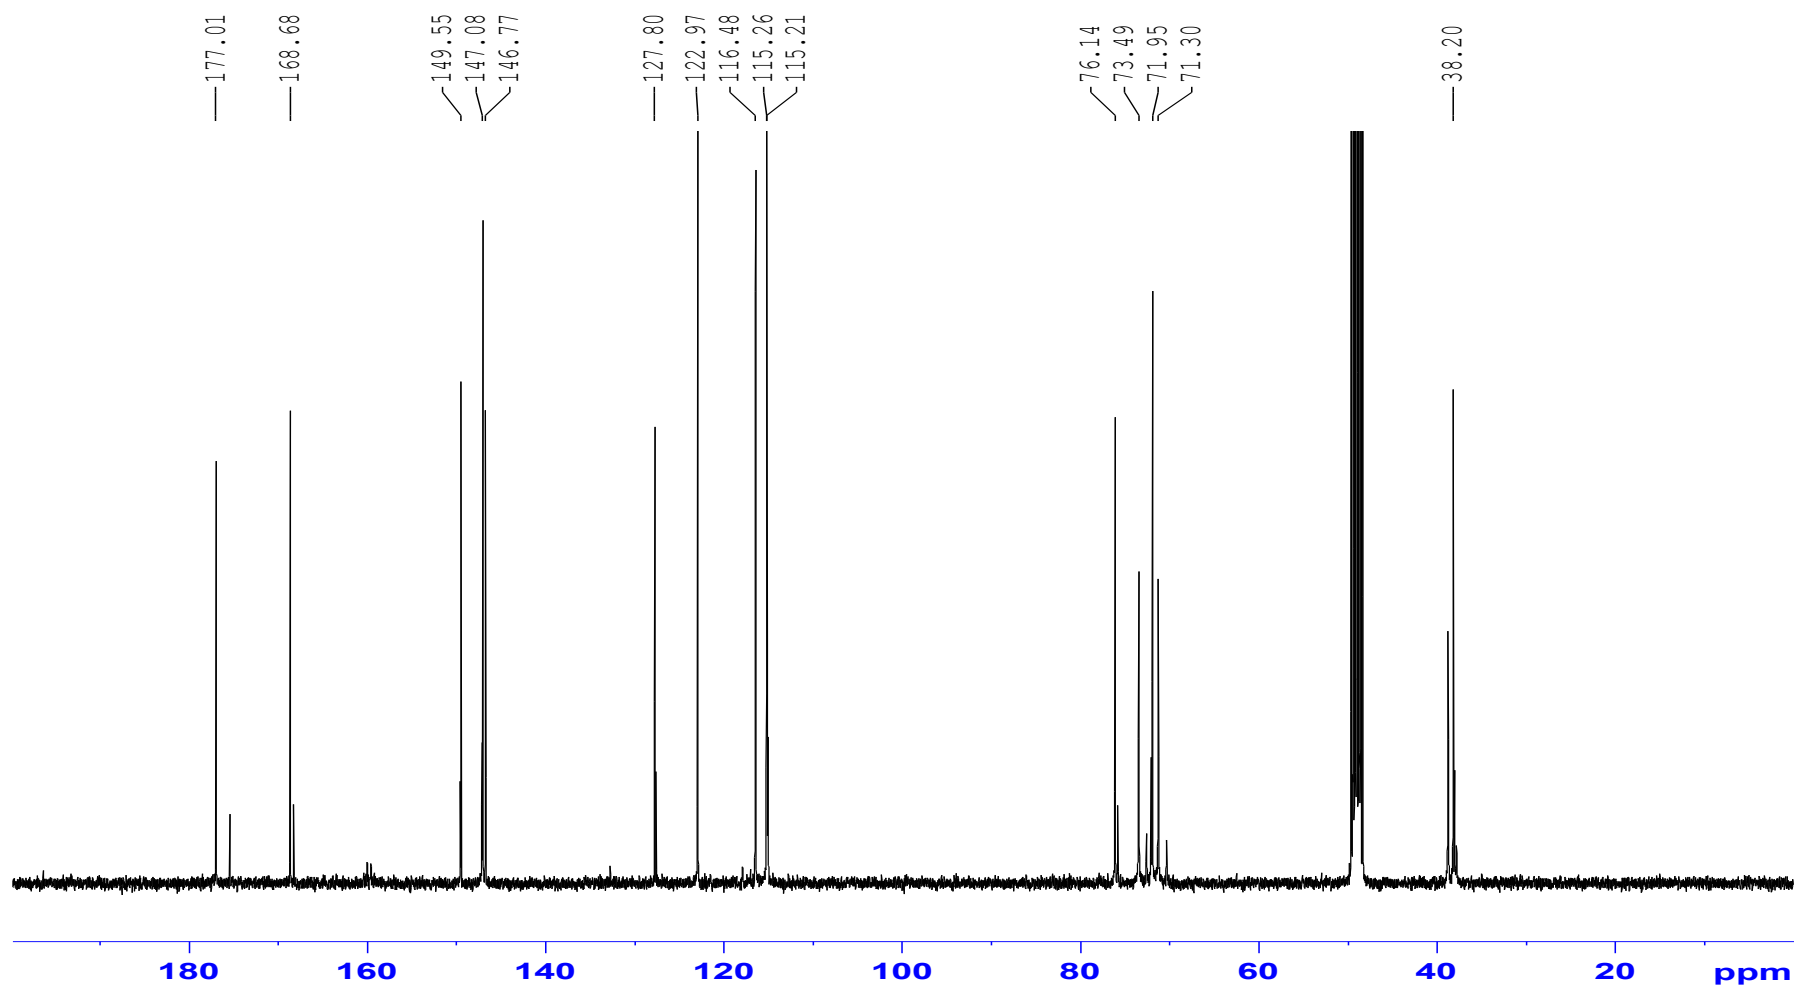

Figure S38. <sup>13</sup>C NMR spectrum of **8** in CD<sub>3</sub>OD (100 MHz).

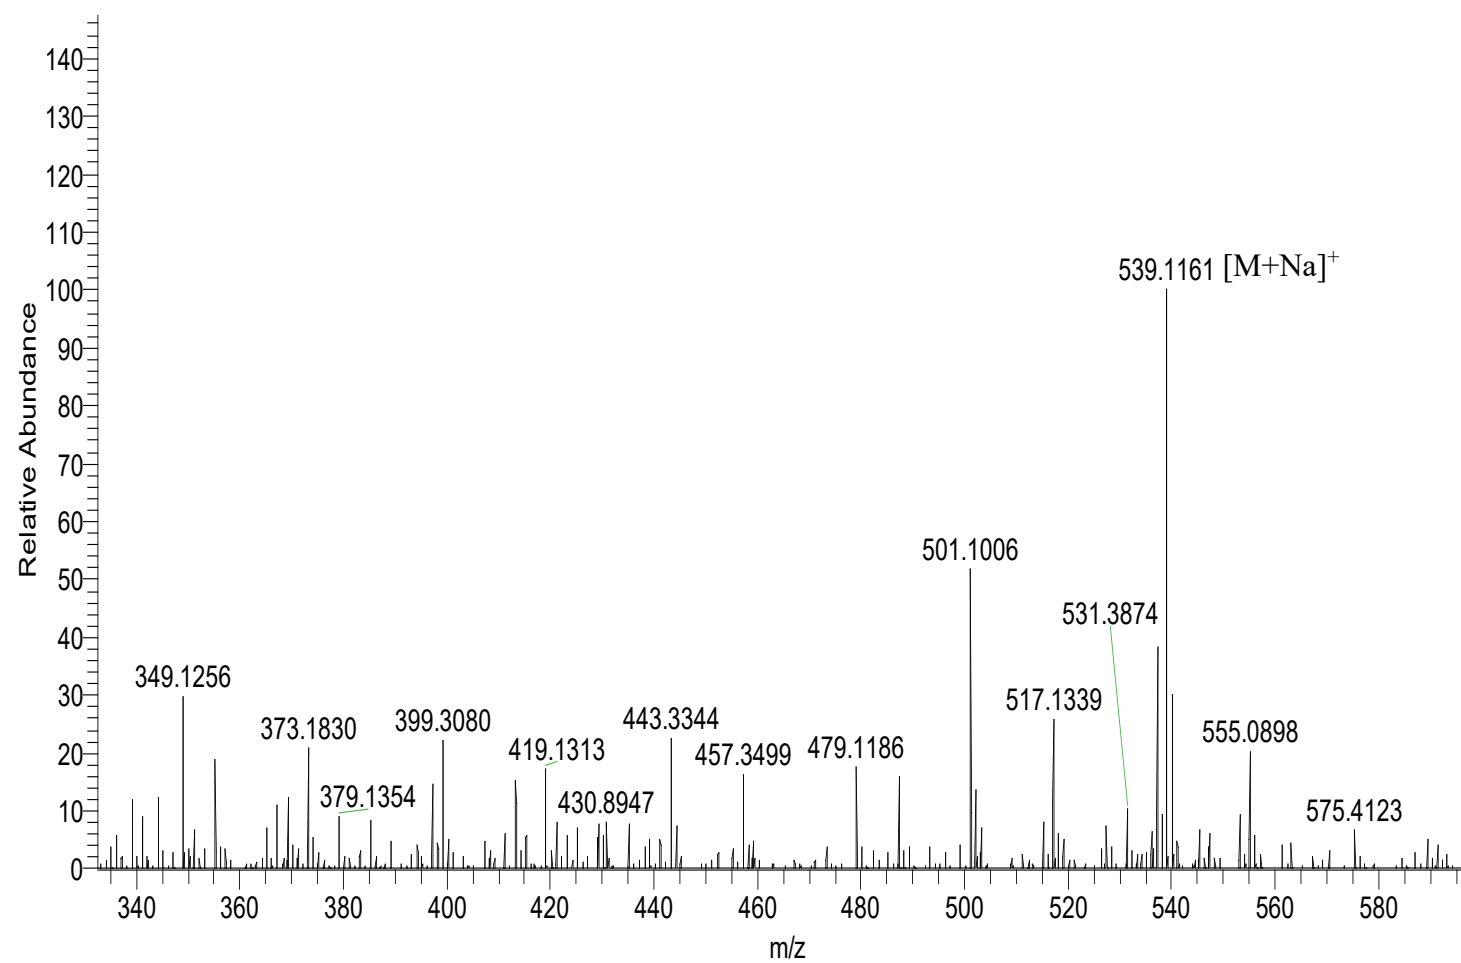

**Figure S39.** HRESIMS spectrum of **9** (positive mode).



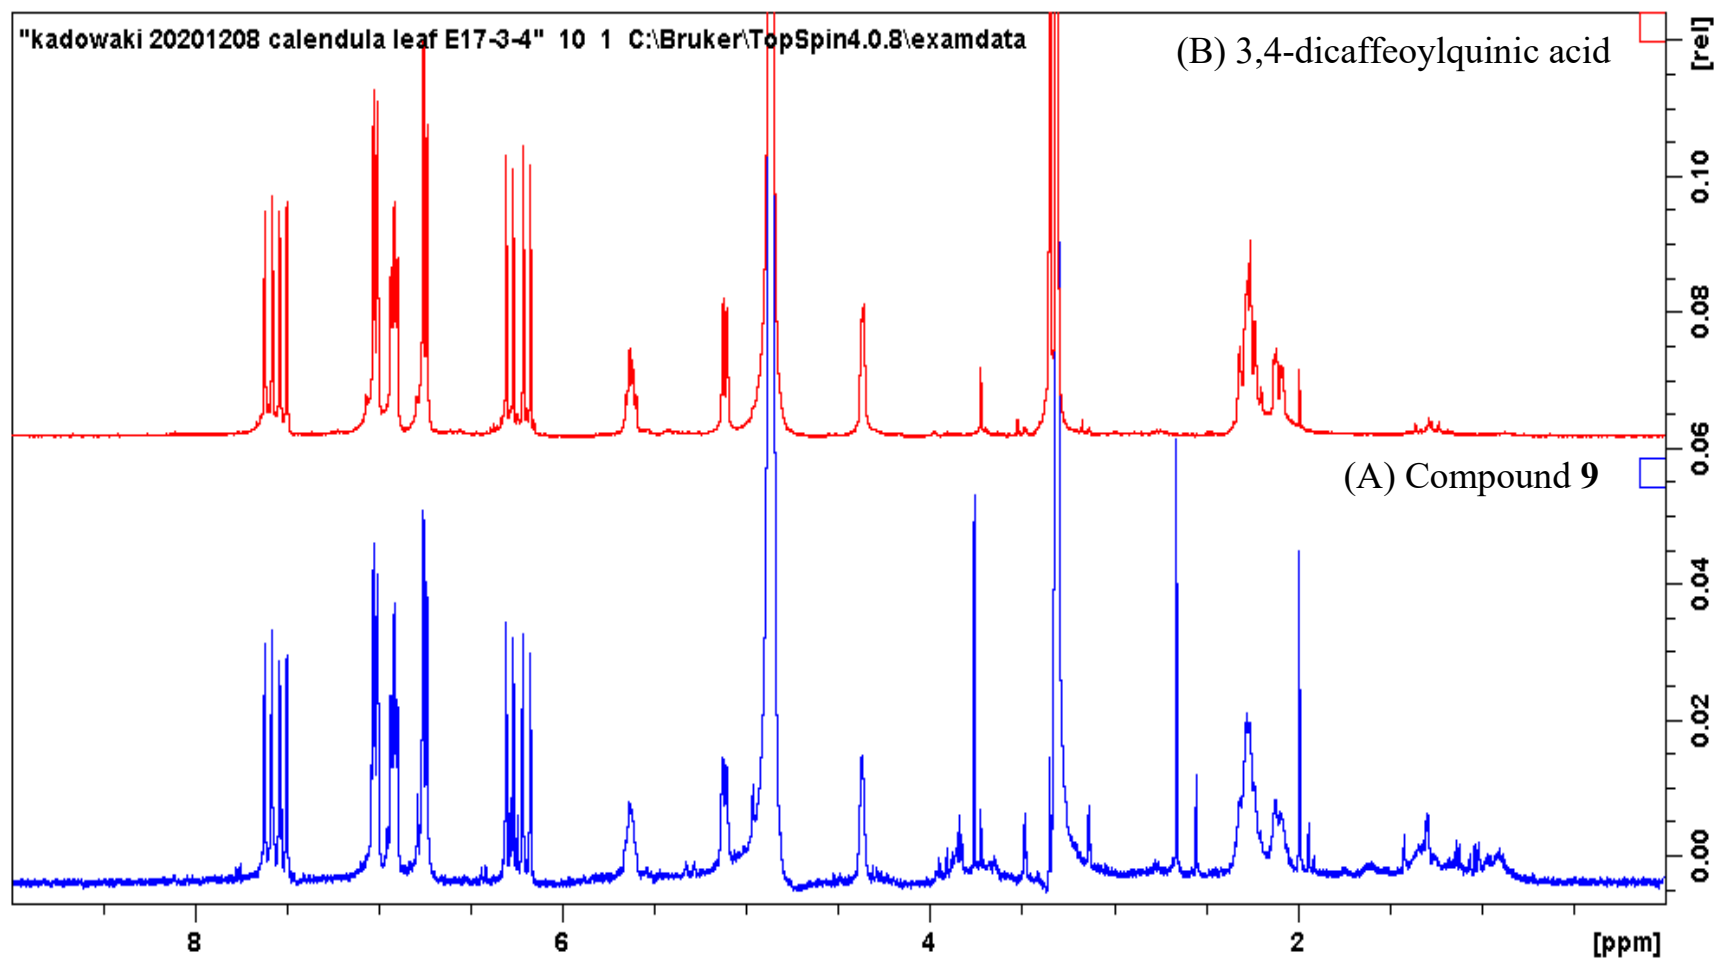

**Figure S40.**  $^1\text{H}$  NMR spectra of **9** (A) and 3,4-dicaffeoylquinic acid (B) in  $\text{CD}_3\text{OD}$  (400 MHz).

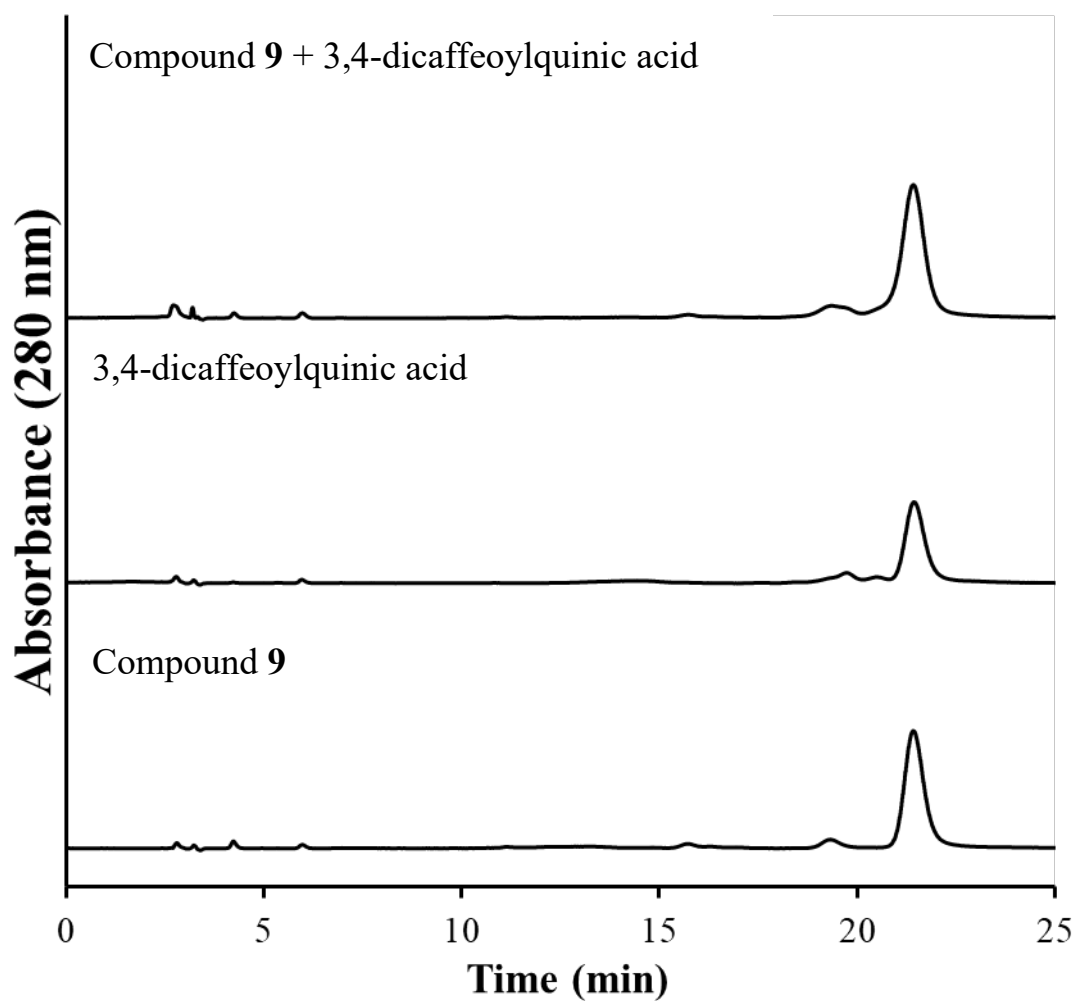

**Figure S41.** HPLC chromatograms of **9** and 3,4-dicaffeoylquinic acid.

<HPLC analysis condition>

Column : Osaka Soda CAPCELL PAK C18 UG120  
 (5  $\mu$ m,  $\phi$ 4.6  $\times$  250 mm)  
 Solvent : H<sub>2</sub>O:MeCN = 80:20 (0.1% TFA)  
 Flow rate : 1.0 mL/min  
 Detection : 280 nm

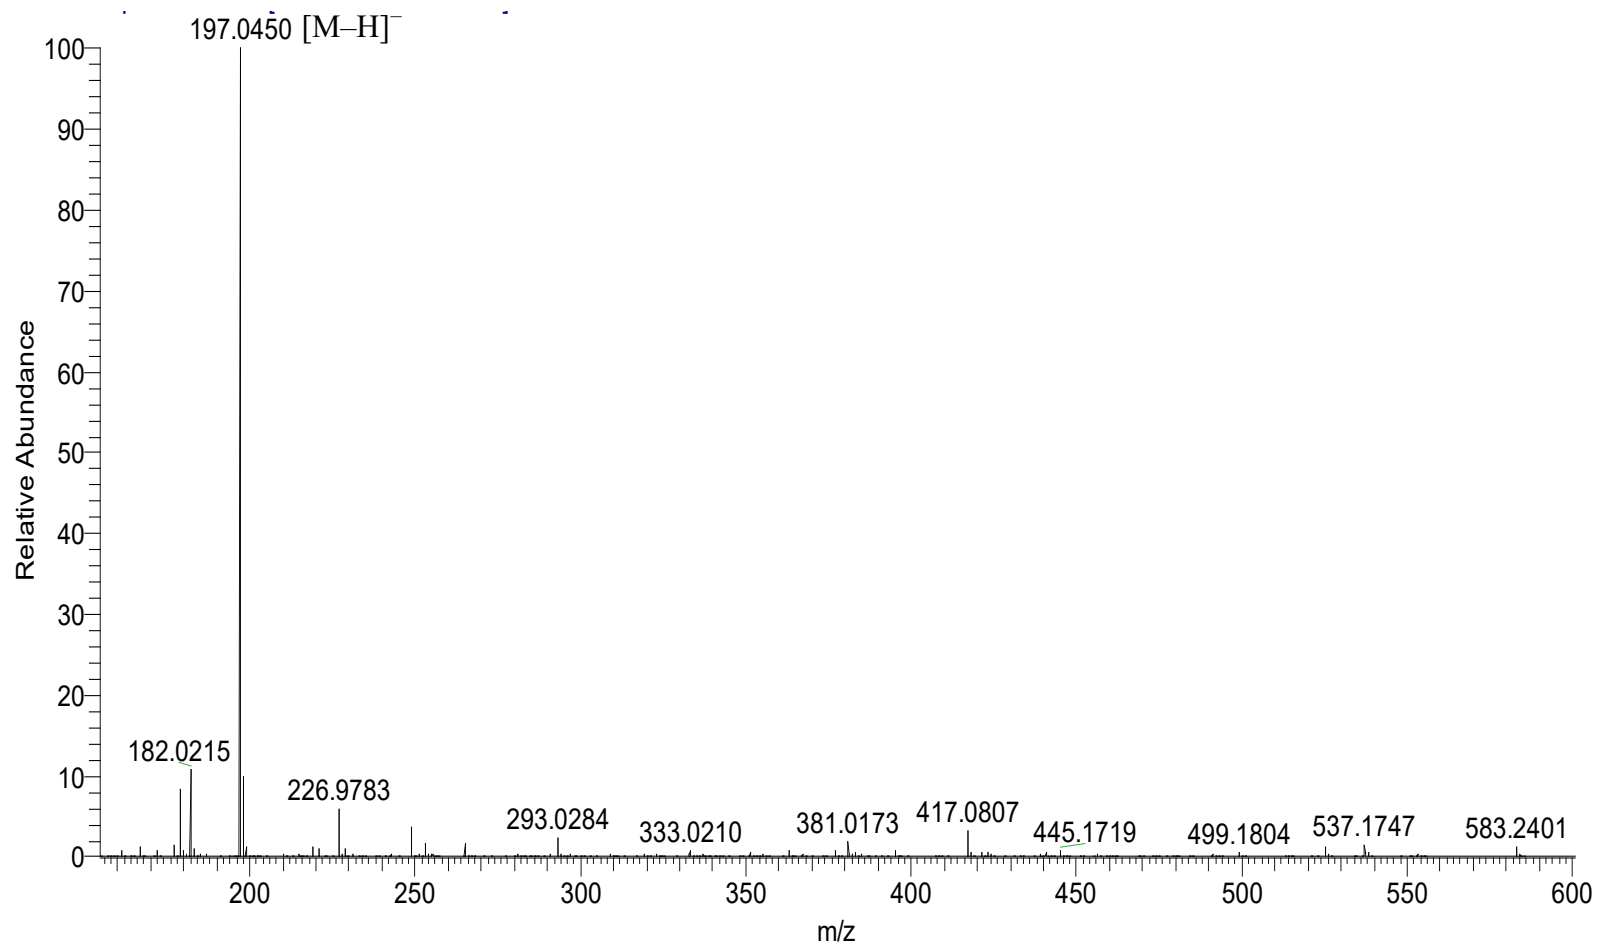

**Figure S42.** HRESIMS spectrum of **10** (negative mode).

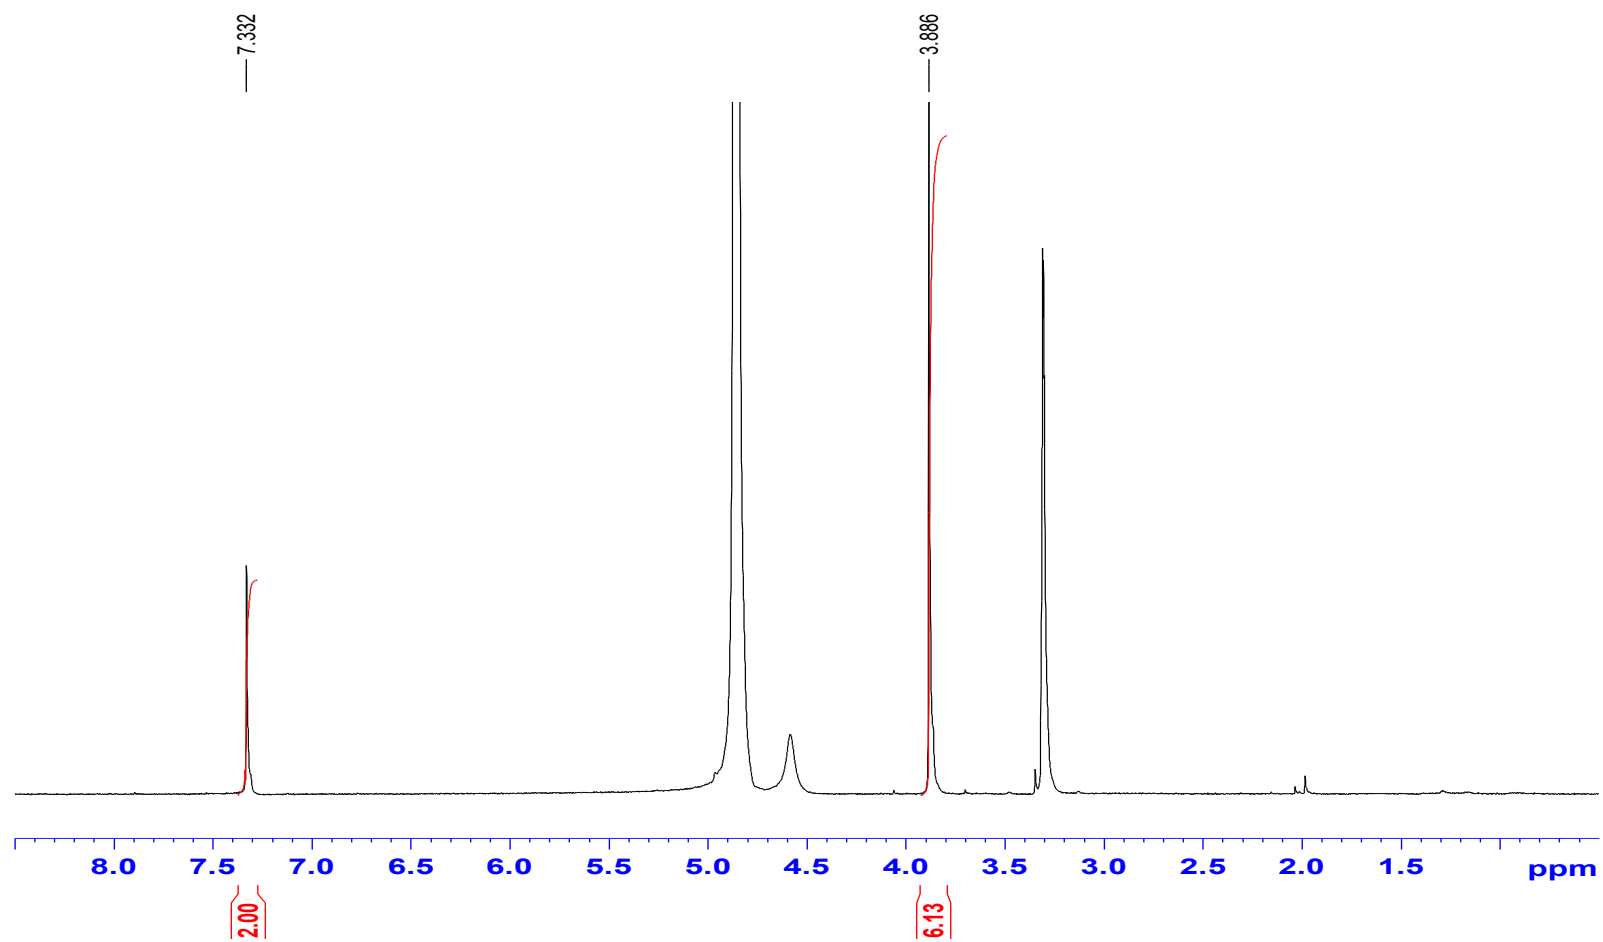

**Figure S43.**  $^1\text{H}$  NMR spectrum of **10** in  $\text{CD}_3\text{OD}$  (400 MHz).

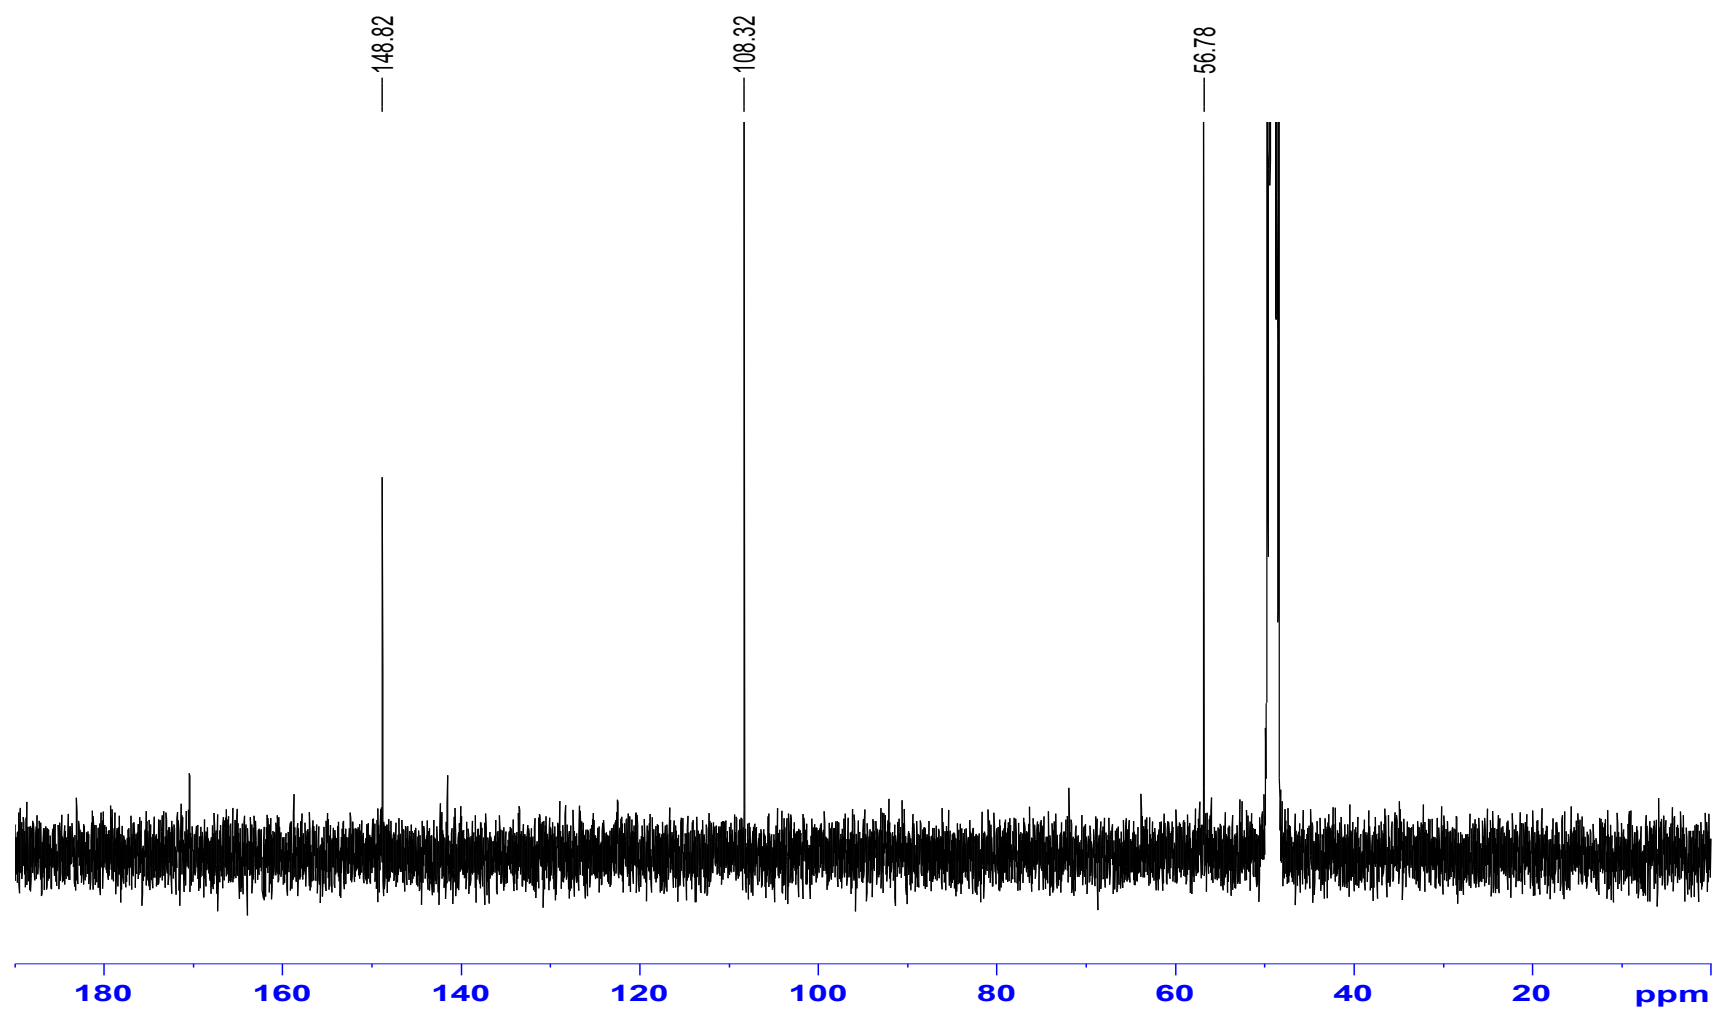

**Figure S44.**  $^{13}\text{C}$  NMR spectrum of **10** in  $\text{CD}_3\text{OD}$  (100 MHz).

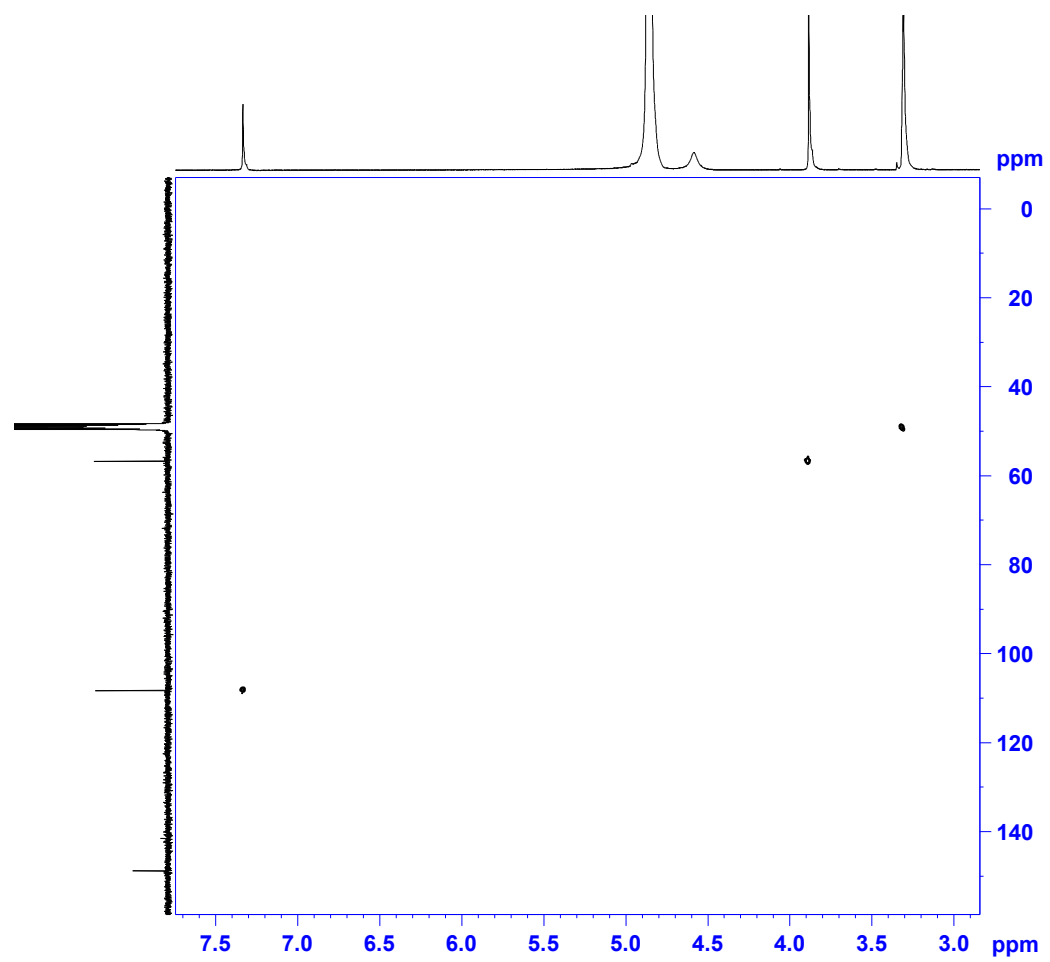

**Figure S45.** HSQC spectrum of **10** in CD<sub>3</sub>OD.

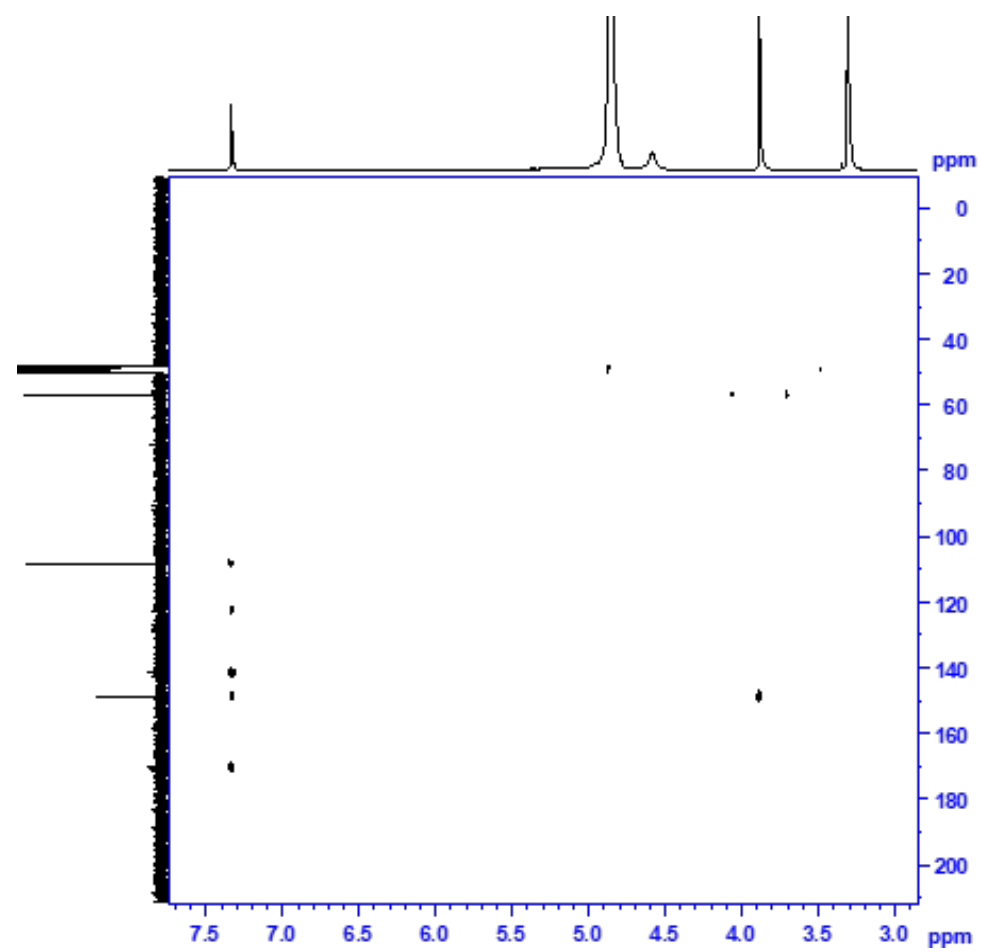

**Figure S46.** HMBC spectrum of **10** in  $\text{CD}_3\text{OD}$ .
